# Supplementary material
Source: PubMed Central journal article supplement (PMC3823714)
Supplement: NIHMS465247-supplement-Author_information.pdf [file NIHMS465247-supplement-Author_information.pdf]

## Online Appendix

- E1. Description of the population-based datasets with references.
- E2. International Classification of Disease (ICD) and Anatomical Therapeutic Chemical Classification (ATC) Codes used to index cases.
- E3. Baseline characteristics of 3,300,708 offspring born 1973-2008 in Sweden and mortality, psychiatric, academic, and social adversity outcomes by gestational age.
- E4. Comparison of the baseline and fixed-effects models with ordinal grouping of gestational age.
- E5. Model selection table comparing the Fit Indices for the linear and quadratic baseline models.
- E6. Modeling results for Academic Problems and additional indices of offspring outcomes (e.g., prescriptions for ADHD, Low IQ, Low Income, and High Income).
- E7. Comparison of the baseline model association gestational age and offspring outcomes estimated separately for (a) offspring from families with more than one child and (b) for offspring without siblings.
- E8. Results of cousin-comparison analyses of gestational age and offspring outcomes.
- E9. Bidirectional case-crossover analyses results.
- E10. Analyses exploring the moderating effect of year of birth on the association between gestational age and infant mortality.
- E11. Comparison of the baseline and fixed-effects models with ordinal grouping of gestational age after dropping observations with extreme values on birth weight.
- E12. Online Appendix References.

## **E1. Description of the population-based datasets with references.**

The data for this prospective national cohort were obtained by linking information available in the following government-maintained population-based registries: (1) the Medical Birth Registry<sup>1,2</sup> includes data on more than 99% of pregnancies in Sweden since 1973; (2) the Multi-Generation Register<sup>3</sup> contains information about biological and adoptive relationships for more than 11 million individuals living in Sweden since 1933; (3) the Migration Register supplies data on dates for migration into or out of Sweden; (4) the Cause of Death Register contains information on dates and causes of all deaths since 1958; (5) the National Patient Registry<sup>4</sup> provides data on all psychiatric inpatient admissions in Sweden since 1973 and all outpatient diagnoses and care since 2001. Every record has a discharge date, the primary discharge diagnosis, and up to seven secondary diagnoses assigned by the treating medical doctor according to WHO's International Classification of Diseases (ICD-10);<sup>5</sup> (6) the National Crime Register includes detailed information about all criminal convictions in lower court since 1973 on those aged 15 (the age of criminal responsibility) and older;<sup>6</sup> (7) the National School Register<sup>7</sup> includes grades in all subjects for all students at the end of grade nine (at age 16 years) since 1983; (8) the Education Register contains information on highest level of completed formal education between 1988 and 2008; (9) the Conscript Registry includes cognitive, psychiatric, and biometric data for all 18-year-old men in Sweden tested for compulsory military service between 1970 and 2009;<sup>8</sup> (10) the longitudinal integrated database for health insurance and social studies (LISA)<sup>9</sup> contains yearly assessments of income, marital status, unemployment status, social welfare status, and education for all individuals 16 years of age and older since 1990; (11) the Swedish Prescribed Drug Register<sup>10</sup> contains individual-based data for all dispensed pharmaceuticals in the entire population of Sweden since July 2005.

**E2. International Classification of Disease (ICD) and Anatomical Therapeutic Chemical Classification (ATC) Codes used to index cases.**

| Outcome                       | ICD Version | Data Source | Description                                                                                   | Codes                                                                                                                           |
|-------------------------------|-------------|-------------|-----------------------------------------------------------------------------------------------|---------------------------------------------------------------------------------------------------------------------------------|
| Psychotic or Bipolar Disorder | 8, 9, 10    | HDR         | Schizophrenia<br>Bipolar disorder<br>Other non-organic psychoses                              | 295, F20<br>296.1, 296.3, 296A-296E, 296W, F30-F31;<br>291, 292, 296.0, 296.2, 296.9, 297-299, 296B, 296X, F32.3 x.5 in F10-F19 |
| Autism                        | 9, 10       | HDR         | Includes disintegrative psychosis, Heller's syndrome, and schizophrenic syndrome of childhood | 299, F84                                                                                                                        |
| ADHD Diagnosis                | 9, 10       | HDR         |                                                                                               | 314, F90                                                                                                                        |
| Suicide Attempt               | 8, 9, 10    | HDR         | Both certain and undetermined attempts including violent, non-violent, and other attempts     | E950-E959, E980-E989, X60-X84, Y870, Y10-Y34, Y872                                                                              |
| Substance Use Problem         | 8, 9, 10    | HDR         | Alcohol and drug abuse (excludes nicotine)                                                    | 303, 304, 305A, 305X, F10 (except x.5), F11-F19 (except x.5)                                                                    |
| Criminality                   | NA          | NCR         | Any criminal act leading to conviction                                                        | Earliest conviction date recorded In the National Crime Register                                                                |
| ADHD Prescription             | 9, 10       | PDR         | Excludes Modafinil (ATC-code N06BA09)                                                         | N06BA04 (Methylphenidate), N06BA09 (Atomoxetine), N06BA01 (Amphetamine), N06BA02 (Dexamphetamine)                               |

Notes: HDR = Hospital Discharge Register; NCR = National Crime Register; PDR = Prescribed Drug Register

Table 1. Baseline characteristics of 3,300,708 offspring born 1973-2008 in Sweden and mortality, psychiatric, academic, and social adversity outcomes by gestational age.

| Covariates and Outcomes                    | Birth Year | N         | Statistic      | Gestational Age Group [ wk - wk, days (n) ] |        |                    |        |                     |        |                      |        |                        |        |
|--------------------------------------------|------------|-----------|----------------|---------------------------------------------|--------|--------------------|--------|---------------------|--------|----------------------|--------|------------------------|--------|
|                                            |            |           |                | 23 - 27, 6 (5,856)                          |        | 28 - 30, 6 (9,663) |        | 31 - 33, 6 (23,913) |        | 34 - 36, 6 (114,890) |        | 37 - 42, 6 (3,146,386) |        |
| <b>Offspring</b>                           | 1973-2008  | 3,300,708 |                |                                             |        |                    |        |                     |        |                      |        |                        |        |
| <b>Female</b>                              |            |           | (n, %)         | 2,661                                       | 45.44  | 4,340              | 44.91  | 10,385              | 43.43  | 51,741               | 45.04  | 1,527,944              | 48.56  |
| <b>Birth Weight (g)</b>                    |            |           | (M, SD)        | 928.25                                      | 465.59 | 1,350.79           | 433.54 | 1,947.08            | 480.99 | 2,703.40             | 493.53 | 3,579.47               | 493.17 |
| <b>Maternal</b>                            | 1924-1995  | 1,736,735 |                |                                             |        |                    |        |                     |        |                      |        |                        |        |
| <b>Age at birth (yrs)</b>                  |            |           | (M, SD)        | 28.21                                       | 5.94   | 28.06              | 5.84   | 27.83               | 5.67   | 27.54                | 5.42   | 27.43                  | 5.11   |
| <b>Upper Secondary Education (1-3 yrs)</b> |            |           | (n, %)         | 1,785                                       | 50.03  | 2,931              | 49.19  | 7,513               | 50.29  | 34,429               | 49.84  | 786,682                | 47.87  |
| <b>Criminality (any)</b>                   |            |           | (n, %)         | 522                                         | 14.63  | 796                | 13.36  | 1,837               | 12.30  | 8,519                | 12.33  | 179,865                | 10.95  |
| <b>Paternal</b>                            | 1904-1993  | 1,729,899 |                |                                             |        |                    |        |                     |        |                      |        |                        |        |
| <b>Age at birth (yrs)</b>                  |            |           | (M, SD)        | 32.60                                       | 6.88   | 32.08              | 6.68   | 31.81               | 6.61   | 31.65                | 6.40   | 31.73                  | 6.03   |
| <b>Upper Secondary Education (1-3 yrs)</b> |            |           | (n, %)         | 1,512                                       | 49.48  | 2,814              | 50.99  | 7,248               | 50.43  | 33,861               | 50.26  | 804,703                | 49.08  |
| <b>Criminality (any)</b>                   |            |           | (n, %)         | 1,162                                       | 38.02  | 2,309              | 41.84  | 5,879               | 40.91  | 27,086               | 40.20  | 610,419                | 37.23  |
| <b>Mortality</b>                           |            |           |                |                                             |        |                    |        |                     |        |                      |        |                        |        |
| <b>Infant Mortality</b>                    | 1973-2008  | 3,300,708 | (n, %)         | 2,352                                       | 40.16  | 1,576              | 16.31  | 1,523               | 6.37   | 2,167                | 1.89   | 8,799                  | 0.28   |
| <b>Died After 1<sup>st</sup> Year</b>      | 1973-2008  | 3,300,708 | (n, K-M est)   | 29                                          | 2.16   | 71                 | 1.73   | 198                 | 1.65   | 759                  | 1.36   | 13,370                 | 0.88   |
| <b>Psychiatric Morbidity</b>               |            |           |                |                                             |        |                    |        |                     |        |                      |        |                        |        |
| <b>Psychotic or Bipolar Disorder</b>       | 1973-1997  | 2,308,032 | (n, K-M est)   | 34                                          | 5.54   | 83                 | 3.02   | 183                 | 2.27   | 811                  | 1.89   | 18,507                 | 1.53   |
| <b>Autism</b>                              | 1980-2001  | 2,032,803 | (n, K-M est) ‡ | 84                                          | 0.80   | 103                | 0.59   | 205                 | 0.41   | 754                  | 0.32   | 14,977                 | 0.29   |
| <b>ADHD Diagnosis</b>                      | 1980-2001  | 2,032,803 | (n, K-M est) ‡ | 113                                         | 1.49   | 181                | 1.11   | 389                 | 0.89   | 1,417                | 0.54   | 28,075                 | 0.35   |
| <b>Suicide Attempt</b>                     | 1973-1997  | 2,308,032 | (n, K-M est)   | 33                                          | 3.59   | 94                 | 3.38   | 246                 | 2.70   | 1,207                | 2.62   | 29,328                 | 2.24   |
| <b>Substance Use Problem</b>               | 1973-1997  | 2,308,032 | (n, K-M est)   | 34                                          | 1.45   | 144                | 3.46   | 368                 | 3.39   | 1,736                | 3.32   | 43,850                 | 3.04   |
| <b>Criminality</b>                         | 1973-1994  | 2,044,992 | (n, K-M est)   | 136                                         | 13.74  | 596                | 18.13  | 1,907               | 18.53  | 10,447               | 19.11  | 271,543                | 17.82  |
| <b>Academic Problems</b>                   |            |           |                |                                             |        |                    |        |                     |        |                      |        |                        |        |
| <b>Failing Grades</b>                      | 1973-1992  | 1,776,454 | (n, %)         | 285                                         | 25.29  | 832                | 21.96  | 2,181               | 18.82  | 10,811               | 17.68  | 252,469                | 14.86  |
| <b>Education under 10 yrs</b>              | 1973-1991  | 1,689,102 | (n, %)         | 479                                         | 44.43  | 1,316              | 36.35  | 3,626               | 32.58  | 18,211               | 31.10  | 464,578                | 28.77  |
| <b>Higher Education</b>                    | 1973-1983  | 911,749   | (n, %)         | 85                                          | 19.59  | 412                | 23.80  | 1,464               | 26.00  | 8,450                | 27.95  | 279,131                | 31.95  |
| <b>Social Adversity</b>                    |            |           |                |                                             |        |                    |        |                     |        |                      |        |                        |        |
| <b>Parenthood</b>                          | 1973-1995  | 2,138,861 | (n, K-M est)   | 176                                         | 14.48  | 802                | 15.74  | 2,702               | 16.01  | 15,794               | 16.82  | 477,438                | 15.39  |
| <b>Ever Partnered</b>                      | 1973-1990  | 1,609,646 | (n, K-M est)   | 77                                          | 5.31   | 372                | 11.99  | 1,232               | 16.39  | 7,402                | 20.17  | 197,945                | 18.92  |
| <b>Social Welfare Benefits</b>             | 1973-1990  | 1,609,646 | (n, K-M est)   | 299                                         | 37.44  | 1,021              | 37.01  | 3,014               | 34.15  | 14,921               | 31.47  | 362,204                | 27.89  |

Note. n = number of cases in the gestational age group; % = percentage of cases in the gestational age group; M = mean; SD = standard deviation; K-M est = Kaplan-Meier product-limit survival estimate; ‡ = K-M estimate for diagnosis by the age of 10 years; all other estimates are for 25 years of age.

#### E4. Comparison of the baseline and fixed-effects models with ordinal grouping of gestational age.

The tables below present the unstandardized regression coefficients (with standard errors) and the point estimates (either Odds Ratios or Hazard Ratios, with the 95% confidence intervals) associated with the ordinal bins of gestational age. The estimates for the Baseline Model are equivalent to the point estimates presented in Figure 1.

The estimates for the Fixed-effects models provide sensitivity analyses, which examine the sibling-comparisons results without assumptions about the underlying pattern (i.e., linear or quadratic) of the associations between gestational age and the indices of mortality and morbidity. Figure E4 provides a graphical comparison of the Baseline and Fixed-effects models based on the ordinal analyses. The confidence intervals around the Fixed-effects models using the ordinal bins are larger than those presented in the main analyses, given the loss of statistical power in moving from a continuous representation of gestational age to arbitrary ordinal bins. The Fixed-effects results with the ordinal representation of gestational age, however, give commensurate results with those based on linear and quadratic models presented in the main analyses. The results from these analyses suggest that assumptions about the shape of model fitting using families with multiple offspring (which are the only informative families for the sibling-comparison estimates) do not account for the fixed effects results using the continuous index of gestational age.

**Table E.3.1 Maximum likelihood (ML) estimates for the baseline and fixed-effects models with ordinal gestational age (GA) predicting offspring *mortality* outcomes.**

| Outcome             | Model         | GA Category (wks) | b     | SE    | ChiSq     | Pr > ChiSq | Point Estimate | 95% CL  |         |
|---------------------|---------------|-------------------|-------|-------|-----------|------------|----------------|---------|---------|
|                     |               |                   |       |       |           |            |                | Lower   | Upper   |
| Infant Mortality    | Baseline      | 23-27             | 5.663 | 0.030 | 35724.713 | <.0001     | 288.117        | 271.684 | 305.544 |
|                     |               | 28-30             | 4.288 | 0.030 | 20299.455 | <.0001     | 72.832         | 68.660  | 77.258  |
|                     |               | 31-33             | 3.206 | 0.029 | 12371.413 | <.0001     | 24.686         | 23.330  | 26.121  |
|                     |               | 34-36             | 1.929 | 0.024 | 6311.115  | <.0001     | 6.880          | 6.560   | 7.215   |
|                     | Fixed-effects | 23-27             | 5.573 | 0.186 | 893.562   | <.0001     | 263.300        | 182.705 | 379.449 |
|                     |               | 28-30             | 4.094 | 0.133 | 947.721   | <.0001     | 59.996         | 46.229  | 77.862  |
|                     |               | 31-33             | 2.951 | 0.094 | 981.611   | <.0001     | 19.117         | 15.895  | 22.992  |
|                     |               | 34-36             | 1.722 | 0.055 | 969.577   | <.0001     | 5.594          | 5.020   | 6.235   |
| Died After 1st Year | Baseline      | 23-27             | 1.048 | 0.186 | 31.783    | <.0001     | 2.852          | 1.981   | 4.106   |
|                     |               | 28-30             | 0.823 | 0.119 | 47.848    | <.0001     | 2.278          | 1.804   | 2.876   |
|                     |               | 31-33             | 0.736 | 0.072 | 105.721   | <.0001     | 2.088          | 1.815   | 2.403   |
|                     |               | 34-36             | 0.439 | 0.037 | 137.846   | <.0001     | 1.550          | 1.441   | 1.668   |
|                     | Fixed-effects | 23-27             | 1.132 | 0.350 | 10.490    | 0.001      | 3.102          | 1.564   | 6.154   |
|                     |               | 28-30             | 1.128 | 0.239 | 22.352    | <.0001     | 3.089          | 1.935   | 4.929   |
|                     |               | 31-33             | 0.800 | 0.136 | 34.370    | <.0001     | 2.225          | 1.703   | 2.908   |
|                     |               | 34-36             | 0.480 | 0.070 | 47.686    | <.0001     | 1.616          | 1.410   | 1.852   |

Note. The GA (gestational age) reference group included offspring born between 37 weeks and 42 weeks and 6 days. For each group, the table lists the unstandardized regression coefficients (b), the standard error of the estimate (SE), Chi Square statistics, regression coefficients converted to either a hazard ratio (for all right-censored outcomes) or an odds ratio (for logistic outcomes), and 95% confidence limits on the point estimate of the model.

**Table E4.2. ML estimates for the baseline and fixed-effects models with ordinal gestational age (GA) predicting offspring *psychiatric morbidity*.**

| Outcome                       | Model         | GA Category (wks) | b      | SE    | ChiSq   | Pr > ChiSq | Point Estimate | 95% CL |        |
|-------------------------------|---------------|-------------------|--------|-------|---------|------------|----------------|--------|--------|
|                               |               |                   |        |       |         |            |                | Lower  | Upper  |
| Psychotic or Bipolar Disorder | Baseline      | 23-27             | 1.155  | 0.172 | 45.331  | <.0001     | 3.173          | 2.267  | 4.441  |
|                               |               | 28-30             | 0.779  | 0.110 | 50.133  | <.0001     | 2.179          | 1.757  | 2.704  |
|                               |               | 31-33             | 0.407  | 0.074 | 29.977  | <.0001     | 1.502          | 1.298  | 1.738  |
|                               |               | 34-36             | 0.222  | 0.036 | 38.364  | <.0001     | 1.249          | 1.164  | 1.340  |
|                               | Fixed-effects | 23-27             | 1.509  | 0.533 | 8.027   | 0.005      | 4.522          | 1.592  | 12.845 |
|                               |               | 28-30             | 0.964  | 0.255 | 14.276  | 0.000      | 2.621          | 1.590  | 4.321  |
|                               |               | 31-33             | 0.127  | 0.156 | 0.670   | 0.413      | 1.136          | 0.837  | 1.541  |
|                               |               | 34-36             | 0.127  | 0.075 | 2.901   | 0.089      | 1.136          | 0.981  | 1.315  |
| Autism                        | Baseline      | 23-27             | 1.176  | 0.109 | 115.796 | <.0001     | 3.242          | 2.616  | 4.016  |
|                               |               | 28-30             | 0.795  | 0.099 | 64.631  | <.0001     | 2.214          | 1.824  | 2.688  |
|                               |               | 31-33             | 0.514  | 0.070 | 53.475  | <.0001     | 1.673          | 1.457  | 1.920  |
|                               |               | 34-36             | 0.230  | 0.037 | 37.844  | <.0001     | 1.258          | 1.170  | 1.354  |
|                               | Fixed-effects | 23-27             | 0.932  | 0.243 | 14.723  | 0.000      | 2.539          | 1.578  | 4.087  |
|                               |               | 28-30             | 0.944  | 0.229 | 17.036  | <.0001     | 2.571          | 1.642  | 4.026  |
|                               |               | 31-33             | 0.408  | 0.154 | 7.002   | 0.008      | 1.503          | 1.111  | 2.033  |
|                               |               | 34-36             | 0.213  | 0.076 | 7.962   | 0.005      | 1.238          | 1.067  | 1.436  |
| ADHD Diagnosis                | Baseline      | 23-27             | 0.853  | 0.094 | 82.343  | <.0001     | 2.347          | 1.952  | 2.823  |
|                               |               | 28-30             | 0.740  | 0.075 | 98.723  | <.0001     | 2.097          | 1.812  | 2.427  |
|                               |               | 31-33             | 0.533  | 0.051 | 109.073 | <.0001     | 1.705          | 1.542  | 1.884  |
|                               |               | 34-36             | 0.237  | 0.027 | 75.772  | <.0001     | 1.268          | 1.202  | 1.337  |
|                               | Fixed-effects | 23-27             | 0.490  | 0.207 | 5.619   | 0.018      | 1.632          | 1.089  | 2.447  |
|                               |               | 28-30             | 0.647  | 0.174 | 13.911  | 0.000      | 1.911          | 1.360  | 2.685  |
|                               |               | 31-33             | 0.292  | 0.113 | 6.712   | 0.010      | 1.339          | 1.074  | 1.669  |
|                               |               | 34-36             | 0.143  | 0.059 | 5.916   | 0.015      | 1.153          | 1.028  | 1.294  |
| Suicide Attempt               | Baseline      | 23-27             | 0.547  | 0.174 | 9.861   | 0.002      | 1.728          | 1.228  | 2.431  |
|                               |               | 28-30             | 0.418  | 0.103 | 16.389  | <.0001     | 1.519          | 1.241  | 1.860  |
|                               |               | 31-33             | 0.253  | 0.064 | 15.552  | <.0001     | 1.287          | 1.135  | 1.459  |
|                               |               | 34-36             | 0.166  | 0.029 | 31.859  | <.0001     | 1.180          | 1.114  | 1.250  |
|                               | Fixed-effects | 23-27             | 0.097  | 0.350 | 0.077   | 0.781      | 1.102          | 0.555  | 2.189  |
|                               |               | 28-30             | 0.172  | 0.211 | 0.670   | 0.413      | 1.188          | 0.786  | 1.796  |
|                               |               | 31-33             | -0.135 | 0.123 | 1.201   | 0.273      | 0.874          | 0.686  | 1.112  |
|                               |               | 34-36             | 0.015  | 0.056 | 0.070   | 0.791      | 1.015          | 0.910  | 1.132  |
| Substance Use Problem         | Baseline      | 23-27             | -0.697 | 0.172 | 16.516  | <.0001     | 0.498          | 0.356  | 0.697  |
|                               |               | 28-30             | 0.095  | 0.083 | 1.282   | 0.258      | 1.099          | 0.933  | 1.294  |
|                               |               | 31-33             | 0.102  | 0.052 | 3.766   | 0.052      | 1.107          | 0.999  | 1.227  |
|                               |               | 34-36             | 0.065  | 0.024 | 7.057   | 0.008      | 1.067          | 1.017  | 1.120  |
|                               | Fixed-effects | 23-27             | -0.830 | 0.259 | 10.243  | 0.001      | 0.436          | 0.262  | 0.725  |
|                               |               | 28-30             | -0.284 | 0.143 | 3.937   | 0.047      | 0.753          | 0.569  | 0.997  |
|                               |               | 31-33             | -0.040 | 0.092 | 0.191   | 0.662      | 0.961          | 0.802  | 1.150  |
|                               |               | 34-36             | -0.113 | 0.043 | 6.838   | 0.009      | 0.893          | 0.820  | 0.972  |
| Criminality                   | Baseline      | 23-27             | -0.340 | 0.086 | 15.718  | <.0001     | 0.712          | 0.602  | 0.842  |
|                               |               | 28-30             | -0.047 | 0.041 | 1.304   | 0.253      | 0.954          | 0.881  | 1.034  |
|                               |               | 31-33             | -0.025 | 0.023 | 1.224   | 0.269      | 0.975          | 0.932  | 1.020  |
|                               |               | 34-36             | 0.026  | 0.010 | 6.822   | 0.009      | 1.026          | 1.007  | 1.047  |
|                               | Fixed-effects | 23-27             | -0.413 | 0.150 | 7.627   | 0.006      | 0.661          | 0.493  | 0.887  |
|                               |               | 28-30             | -0.345 | 0.078 | 19.591  | <.0001     | 0.708          | 0.608  | 0.825  |
|                               |               | 31-33             | -0.196 | 0.043 | 20.522  | <.0001     | 0.822          | 0.755  | 0.895  |
|                               |               | 34-36             | -0.101 | 0.019 | 28.069  | <.0001     | 0.904          | 0.871  | 0.938  |

Note. See note on Table E4.1

**Table E4.3. ML estimates for the baseline and fixed-effects models with ordinal gestational age (GA) predicting offspring *academic problems*.**

| Outcome                | Model         | GA Category (wks) | b      | SE    | ChiSq   | Pr > ChiSq | Point Estimate | 95% CL |       |
|------------------------|---------------|-------------------|--------|-------|---------|------------|----------------|--------|-------|
|                        |               |                   |        |       |         |            |                | Lower  | Upper |
| Failing Grades         | Baseline      | 23-27             | 0.707  | 0.070 | 103.517 | <.0001     | 2.028          | 1.770  | 2.324 |
|                        |               | 28-30             | 0.486  | 0.040 | 149.152 | <.0001     | 1.625          | 1.503  | 1.757 |
|                        |               | 31-33             | 0.267  | 0.024 | 122.875 | <.0001     | 1.307          | 1.246  | 1.370 |
|                        |               | 34-36             | 0.191  | 0.011 | 304.984 | <.0001     | 1.210          | 1.185  | 1.237 |
|                        | Fixed-effects | 23-27             | 0.684  | 0.156 | 19.184  | <.0001     | 1.982          | 1.460  | 2.693 |
|                        |               | 28-30             | 0.219  | 0.086 | 6.557   | 0.010      | 1.245          | 1.053  | 1.473 |
|                        |               | 31-33             | -0.015 | 0.049 | 0.101   | 0.751      | 0.985          | 0.895  | 1.083 |
|                        |               | 34-36             | -0.045 | 0.022 | 4.119   | 0.042      | 0.956          | 0.915  | 0.998 |
| Education under 10 yrs | Baseline      | 23-27             | 0.544  | 0.065 | 69.778  | <.0001     | 1.722          | 1.516  | 1.956 |
|                        |               | 28-30             | 0.276  | 0.037 | 56.661  | <.0001     | 1.318          | 1.227  | 1.417 |
|                        |               | 31-33             | 0.132  | 0.022 | 37.448  | <.0001     | 1.140          | 1.093  | 1.190 |
|                        |               | 34-36             | 0.072  | 0.010 | 56.474  | <.0001     | 1.075          | 1.055  | 1.095 |
|                        | Fixed-effects | 23-27             | 0.305  | 0.130 | 5.475   | 0.019      | 1.357          | 1.051  | 1.752 |
|                        |               | 28-30             | -0.040 | 0.074 | 0.296   | 0.586      | 0.961          | 0.831  | 1.110 |
|                        |               | 31-33             | -0.129 | 0.043 | 8.814   | 0.003      | 0.879          | 0.808  | 0.957 |
|                        |               | 34-36             | -0.154 | 0.019 | 63.325  | <.0001     | 0.858          | 0.826  | 0.891 |
| Higher Education       | Baseline      | 23-27             | -0.672 | 0.122 | 30.171  | <.0001     | 0.511          | 0.402  | 0.649 |
|                        |               | 28-30             | -0.395 | 0.057 | 47.619  | <.0001     | 0.674          | 0.602  | 0.754 |
|                        |               | 31-33             | -0.257 | 0.031 | 69.214  | <.0001     | 0.773          | 0.728  | 0.822 |
|                        |               | 34-36             | -0.159 | 0.013 | 144.585 | <.0001     | 0.853          | 0.831  | 0.875 |
|                        | Fixed-effects | 23-27             | -0.857 | 0.329 | 6.768   | 0.009      | 0.425          | 0.223  | 0.810 |
|                        |               | 28-30             | 0.230  | 0.148 | 2.413   | 0.120      | 1.258          | 0.942  | 1.681 |
|                        |               | 31-33             | 0.081  | 0.079 | 1.050   | 0.306      | 1.085          | 0.929  | 1.267 |
|                        |               | 34-36             | -0.009 | 0.033 | 0.079   | 0.779      | 0.991          | 0.928  | 1.057 |

Note. See note on Table E4.1

**E4.4. ML estimates for the baseline and fixed-effects models with ordinal gestational age (GA) predicting offspring *social adversity*. The GA reference bin included offspring born between 37 weeks and 42 weeks and 6 days.**

| Outcome                    | Model         | GA<br>Category<br>(wks) | b      | SE    | ChiSq   | Pr ><br>ChiSq | Point<br>Estimate | 95% CL |       |
|----------------------------|---------------|-------------------------|--------|-------|---------|---------------|-------------------|--------|-------|
|                            |               |                         |        |       |         |               |                   | Lower  | Upper |
| Parenthood                 | Baseline      | 23-27                   | -0.303 | 0.075 | 16.121  | <.0001        | 0.739             | 0.637  | 0.857 |
|                            |               | 28-30                   | -0.075 | 0.035 | 4.507   | 0.034         | 0.928             | 0.866  | 0.994 |
|                            |               | 31-33                   | -0.070 | 0.019 | 13.113  | 0.000         | 0.933             | 0.898  | 0.968 |
|                            |               | 34-36                   | 0.021  | 0.008 | 6.638   | 0.010         | 1.021             | 1.005  | 1.037 |
|                            | Fixed-effects | 23-27                   | -0.539 | 1.238 | 0.190   | 0.663         | 0.583             | 0.052  | 6.597 |
|                            |               | 28-30                   | 0.150  | 0.447 | 0.113   | 0.737         | 1.162             | 0.484  | 2.792 |
|                            |               | 31-33                   | -0.071 | 0.235 | 0.091   | 0.763         | 0.931             | 0.587  | 1.478 |
|                            |               | 34-36                   | 0.331  | 0.104 | 10.164  | 0.001         | 1.392             | 1.136  | 1.706 |
| Ever Partnered             | Baseline      | 23-27                   | -1.422 | 0.113 | 158.092 | <.0001        | 0.241             | 0.193  | 0.301 |
|                            |               | 28-30                   | -0.490 | 0.052 | 89.117  | <.0001        | 0.613             | 0.553  | 0.678 |
|                            |               | 31-33                   | -0.144 | 0.029 | 25.409  | <.0001        | 0.866             | 0.819  | 0.916 |
|                            |               | 34-36                   | 0.102  | 0.012 | 74.604  | <.0001        | 1.108             | 1.082  | 1.134 |
|                            | Fixed-effects | 23-27                   | -1.957 | 0.219 | 79.797  | <.0001        | 0.141             | 0.092  | 0.217 |
|                            |               | 28-30                   | -0.756 | 0.108 | 48.876  | <.0001        | 0.469             | 0.380  | 0.580 |
|                            |               | 31-33                   | -0.274 | 0.065 | 17.884  | <.0001        | 0.761             | 0.670  | 0.864 |
|                            |               | 34-36                   | -0.010 | 0.028 | 0.136   | 0.712         | 0.990             | 0.936  | 1.046 |
| Social Welfare<br>Benefits | Baseline      | 23-27                   | 0.295  | 0.058 | 25.909  | <.0001        | 1.342             | 1.199  | 1.504 |
|                            |               | 28-30                   | 0.318  | 0.031 | 103.167 | <.0001        | 1.375             | 1.293  | 1.462 |
|                            |               | 31-33                   | 0.242  | 0.018 | 174.896 | <.0001        | 1.274             | 1.229  | 1.320 |
|                            |               | 34-36                   | 0.157  | 0.008 | 353.324 | <.0001        | 1.170             | 1.151  | 1.189 |
|                            | Fixed-effects | 23-27                   | 0.208  | 0.121 | 2.931   | 0.087         | 1.231             | 0.970  | 1.562 |
|                            |               | 28-30                   | -0.019 | 0.065 | 0.082   | 0.774         | 0.981             | 0.864  | 1.115 |
|                            |               | 31-33                   | -0.065 | 0.038 | 2.960   | 0.085         | 0.937             | 0.871  | 1.009 |
|                            |               | 34-36                   | -0.011 | 0.017 | 0.411   | 0.521         | 0.989             | 0.957  | 1.023 |

Note. See note on Table E4.1



E4. Figures. Comparison of the baseline and fixed-effects models with ordinal grouping of gestational age.

Mortality

E4.1

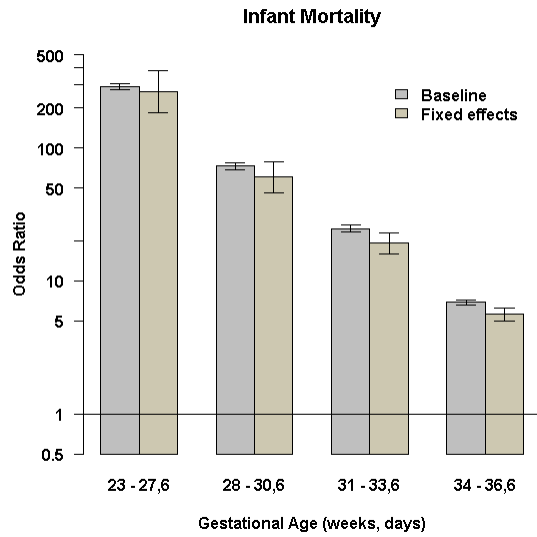

E4.2

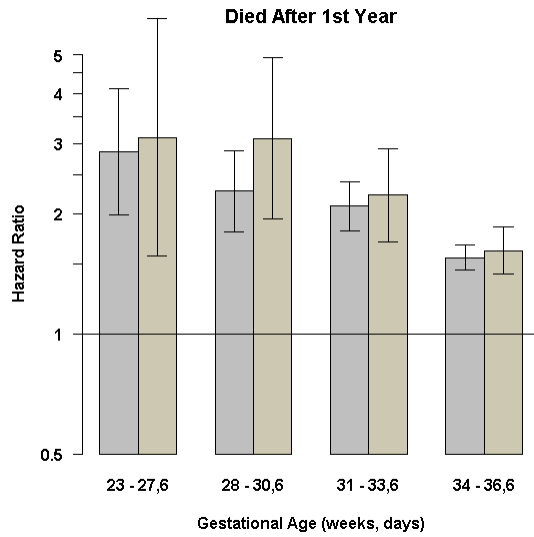

Psychiatric Morbidity

E4.3

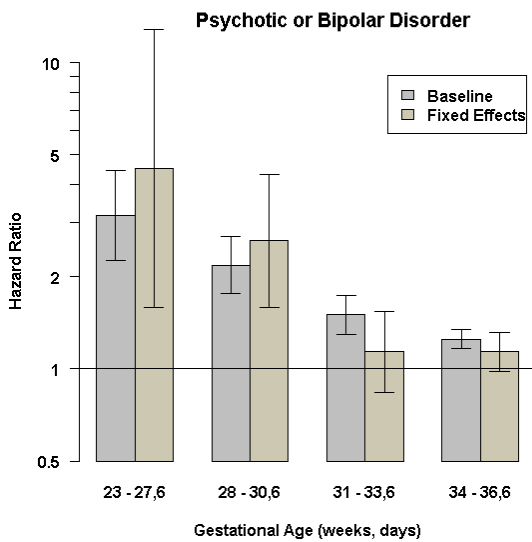

E4.4

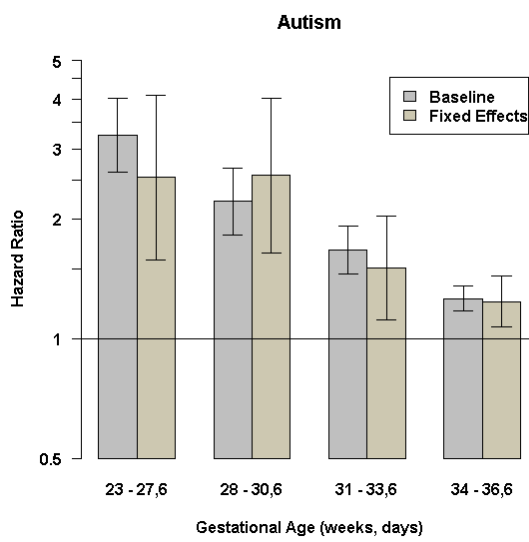

## Psychiatric Morbidity (continued)

E4.5

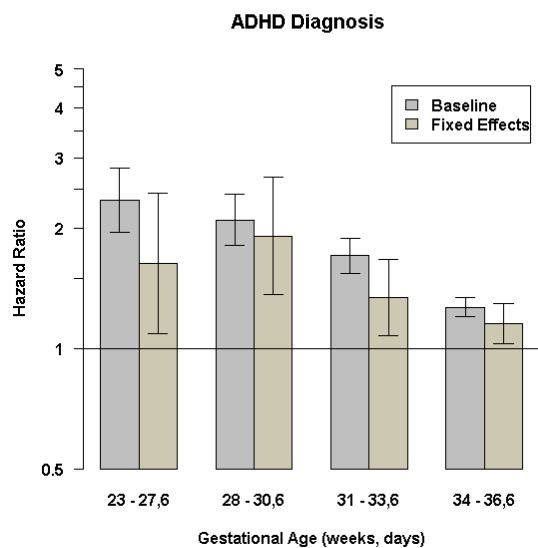

E4.6

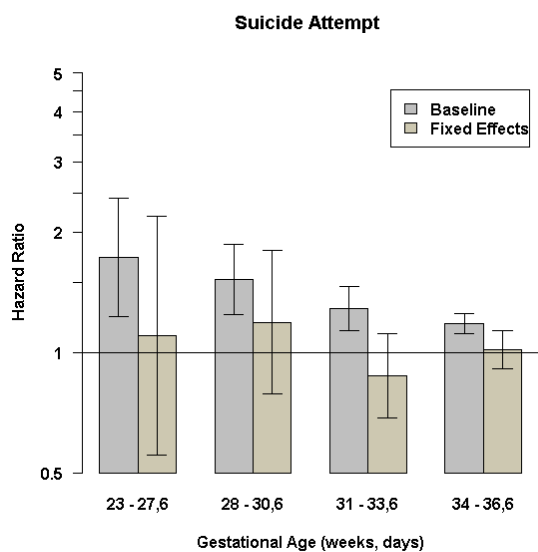

E4.7

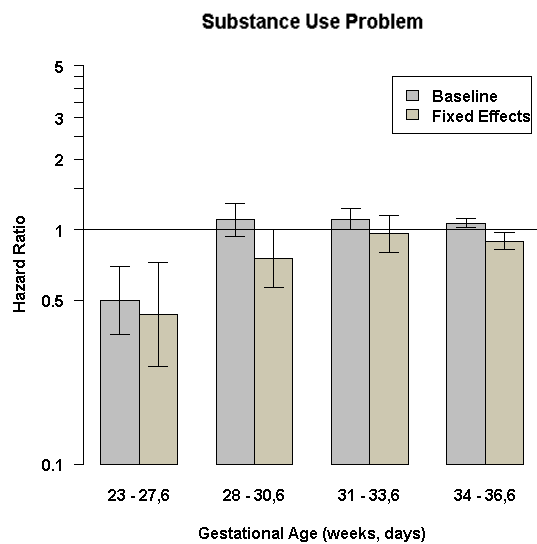

E4.8

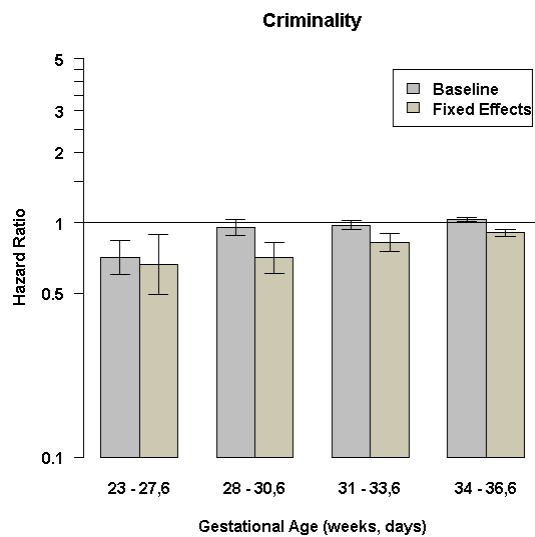

Academic Problems

E4.9

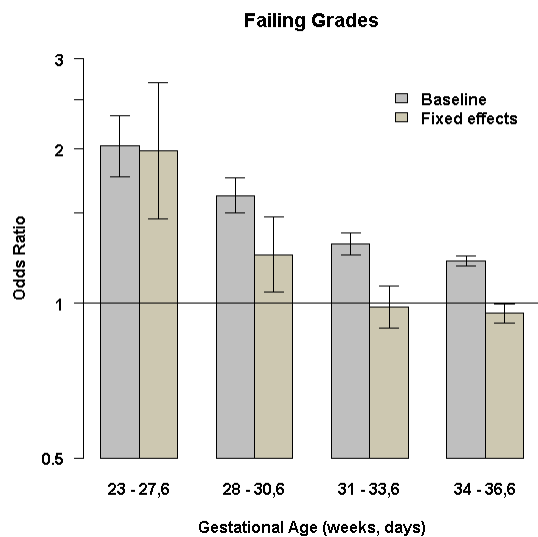

E4.10

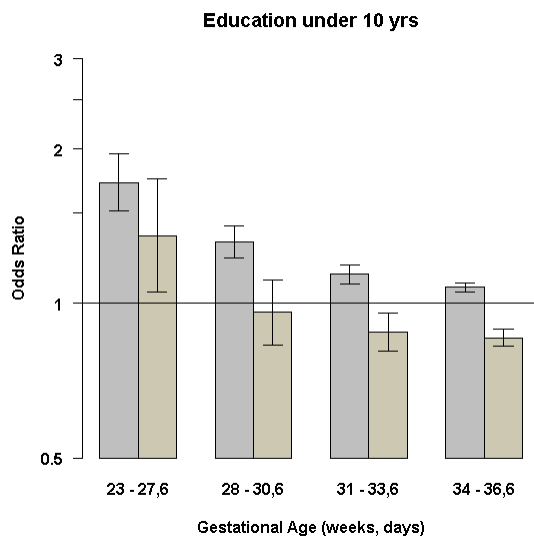

E4.11

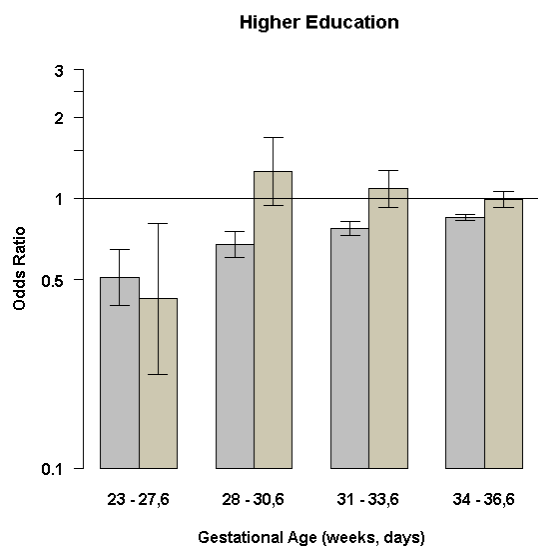

## Social Adversity

E4.12

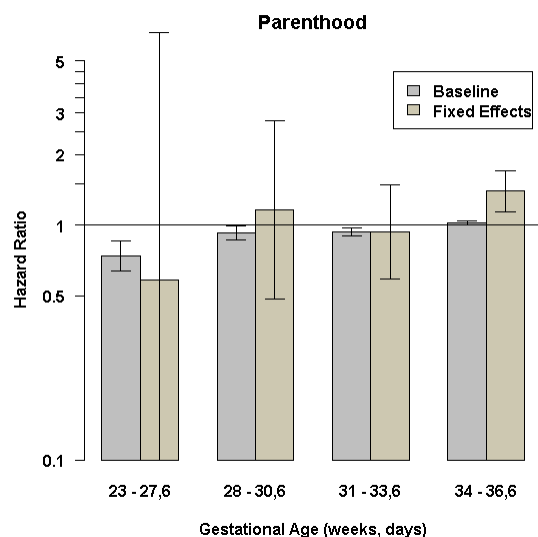

E4.13

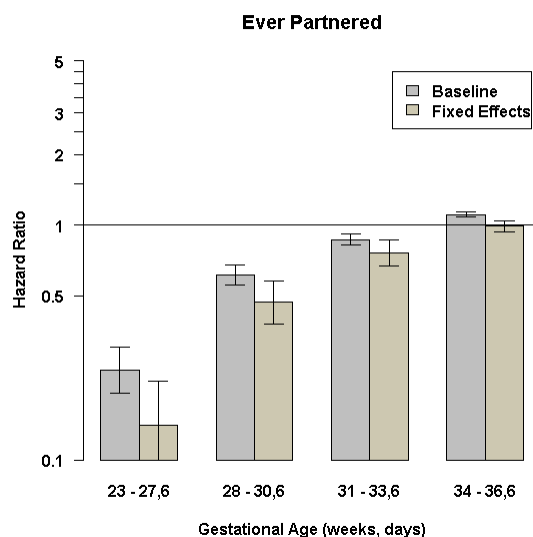

E4.14

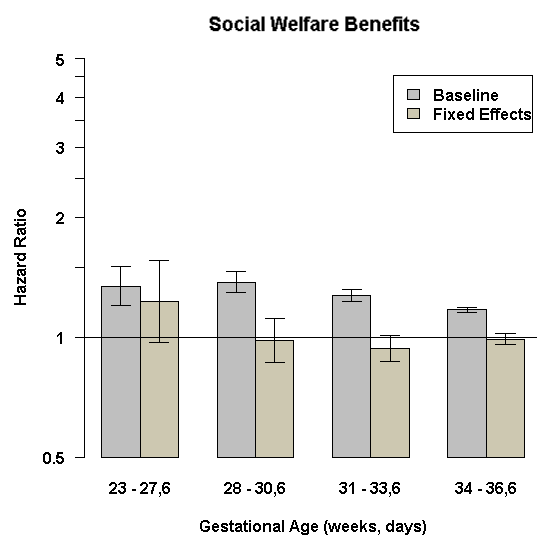

Note. The online appendix figure set presents the comparison of the estimates from the baseline model (that did not control for selection factors) in gray and the fixed-effects models (that controlled for all factors that make siblings similar and the measured covariates) in beige associated with each ordinal category of gestational age for mortality, psychiatric morbidity, cognitive problems, and social adversity compared to offspring born at term. The point estimate for the reference category (i.e., 37 weeks - 42 weeks and 6 days) is equal to 1 (not shown). Error bars represent the 95% Wald confidence limits on the hazard/odds ratio parameter.

**E5. Model selection table comparing the Fit Indices for the linear and quadratic baseline models.**

|                       | Outcome                       | Model          |                  | AIC-min choice | $\Delta$ AIC |
|-----------------------|-------------------------------|----------------|------------------|----------------|--------------|
|                       |                               | Linear GA only | add Quadratic GA |                |              |
| Mortality             | Infant Mortality              | 165416         | 165336           | L + Q          | 80.70        |
|                       | Died After 1st Year           | 409949         | 409932           | L + Q          | 17.62        |
| Psychiatric Morbidity | Psychotic or Bipolar Disorder | 539265         | 539266           | L              | -1.43        |
|                       | Autism                        | 452303         | 452264           | L + Q          | 39.49        |
|                       | ADHD Patient                  | 844589         | 844583           | L + Q          | 6.15         |
|                       | Suicide Attempt               | 863696         | 863698           | L              | -1.78        |
|                       | Substance Use Problem         | 1304150        | 1304097          | L + Q          | 52.60        |
|                       | Criminality                   | 7996315        | 7996317          | L              | -1.80        |
| Academic Problems     | Failing Grades                | 1472772        | 1472572          | L + Q          | 200.00       |
|                       | Education under 10 yrs        | 1846958        | 1846446          | L + Q          | 511.50       |
|                       | Higher Education              | 1112100        | 1111804          | L + Q          | 296.10       |
| Social Adversity      | Parenthood                    | 12461676       | 12461267         | L + Q          | 409.00       |
|                       | Ever Partnered                | 5461498        | 5453188          | L + Q          | 8310.10      |
|                       | Social Welfare Benefits       | 10657582       | 10657205         | L + Q          | 377.00       |

Note. The model selection table compares the AICs for the baseline model with linear (L) gestational age only and the baseline model with both linear and quadratic (L+Q) gestational age. The column labeled “AIC-min choice” indicates which of the two candidate models (L or L+Q) yielded the lowest AIC. The observed difference,  $\Delta$ AIC =  $AIC_L - AIC_{L+Q}$ , provides a measure of relative merit that is free of scaling constants and can be interpreted as strength of evidence for model selection purposes.<sup>11</sup> For example, consider the three outcomes (psychotic or bipolar disorder, suicide attempt, and criminality) for which the model with linear GA only yielded a lower AIC than the model with both linear and quadratic GA. In each case, the rescaled difference  $|\Delta$ AIC| < 2 (small) indicates substantial support for the quadratic model even though the linear model yielded a lower AIC. By contrast, outcomes with  $|\Delta$ AIC| > 10 indicate that the linear model has virtually no support relative to the quadratic model. For all outcomes, the model selected using AIC-min as the criterion is the one selected using the significance level (p-value) of the quadratic coefficient as the criterion.

**E6. Modeling results for Academic Problems and additional indices of offspring outcomes (e.g., prescriptions for ADHD, Low IQ, Low Income, and High Income).**

**Academic Problems**

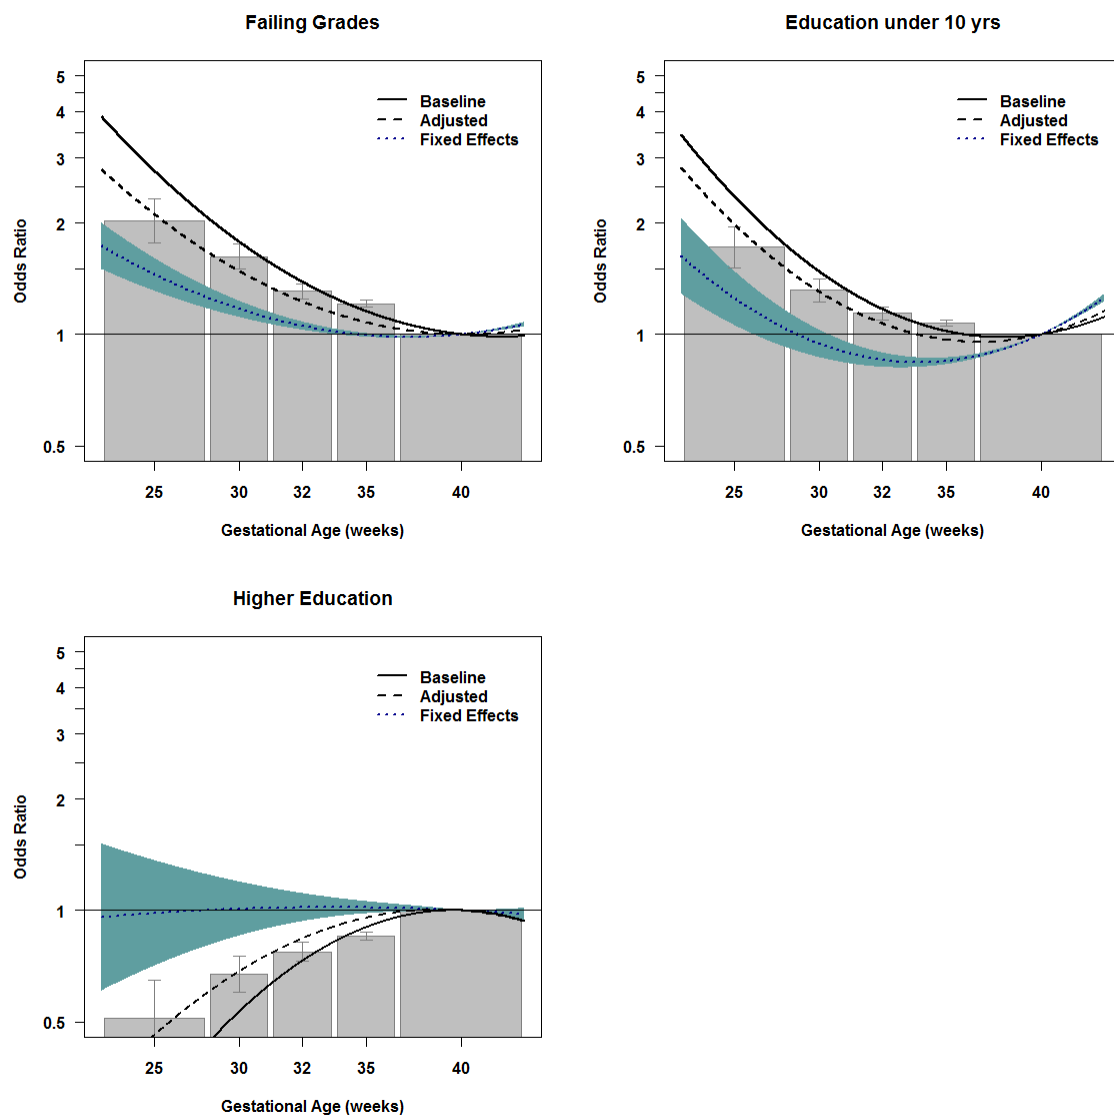

Note. See note in main text for detailed information regarding the interpretation of the figures.

ADHD is based on the prescription registry (see description in E1 and E2). Low IQ (males only) was indexed using a composite measure of general intellectual performance available in the conscript register (see E1) for years 1988-2007. The measure assesses logical-inductive reasoning, verbal ability, visual-spatial perception, as well as theoretical-technical skills. We created a dichotomous outcome by grouping male conscripts in the lowest two stanine scores (1 or 2) into a single category representing low intellectual performance, consistent with previous research.<sup>13</sup> Low income was based on age of individuals the first time their total family income fell below the 20<sup>th</sup> percentile of total family-level disposable income estimated separately for years 1990-2008 using information in LISA. High income is based on the same approach for identifying individuals with low income, although we identified individuals who were ever in the top 20<sup>th</sup> percentile.

E6.1

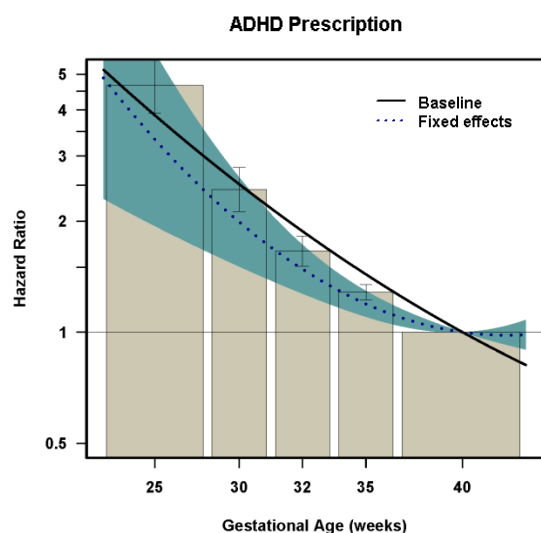

E6.2

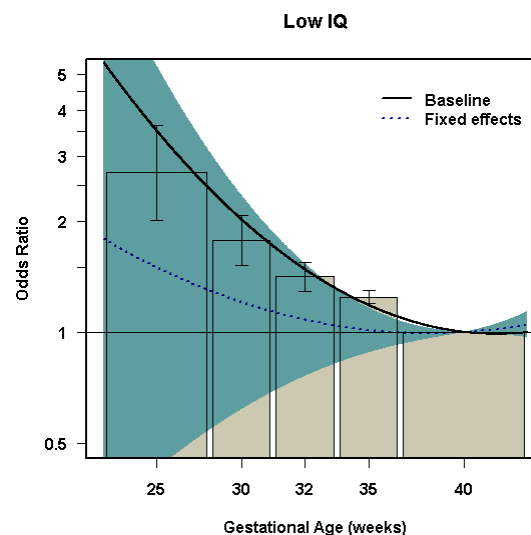

E6.3

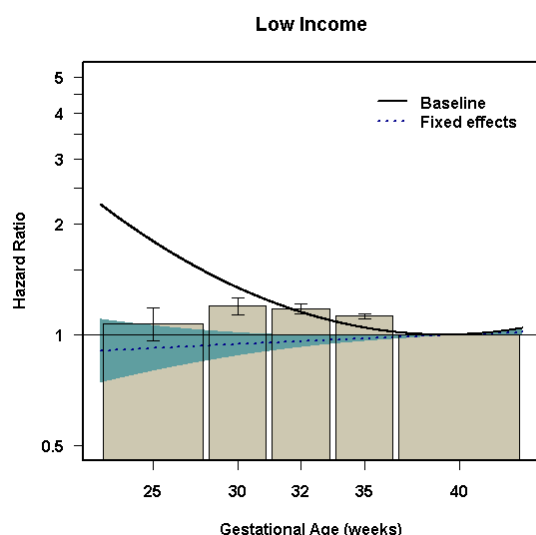

E6.4

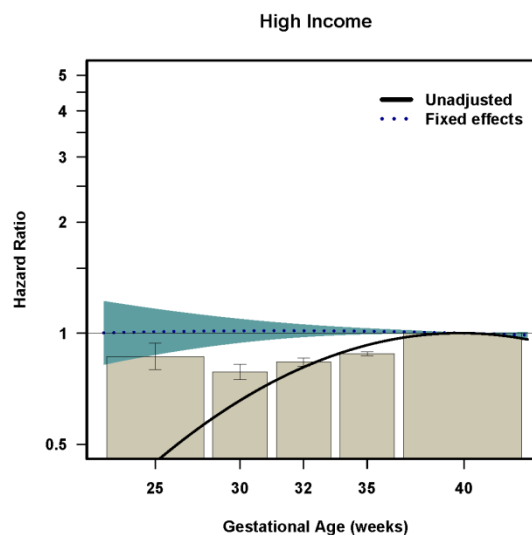

Note. See note in main text for detailed information regarding the interpretation of the figures.

**E7.Figures. Comparison of the baseline model association gestational age and offspring outcomes estimated separately for (a) offspring from families with more than one child and (b) for offspring without siblings.**

Sibling-comparison studies make assumptions about the generalizability of findings from families with multiple offspring to families with only one child. For instance, these designs assume that the magnitude of the associations is comparable in the two types of families. The interpretation of the sibling-comparison results could be confounded if the population-based associations were lower in offspring who had siblings. To help assess whether the assumptions were warranted or justified we estimated the population-based estimates between gestational age and offspring outcomes in (a) offspring with siblings and (b) offspring without siblings.

Each figure below presents two baseline models. One model (dashed blue line with 95% confidence region shaded light grey) was estimated on the sub-sample of offspring ( $n=2,665,666$ , 80.8% of the entire sample) from families with more than one child. The mean gestational age in the subsample was 278.9 days ( $SD=12.39$ ). The second model (solid red line with 95% confidence region shaded blue) was estimated on the sub-sample of offspring without siblings ( $n=635,042$ , 19.2% of the total sample). The mean gestational age in the subsample was 278.7 days ( $SD=13.08$ ).

The figures (a) show that the baseline associations are largely comparable for the two sets of offspring and (b) suggest that the differences between these two subsamples do not account for any smaller sibling-comparison estimates. First, for each outcome, the associations in the two subsamples were always in the same direction. Second, the magnitude of the associations greatly overlap. This is particularly true when considering that 99.5% of the entire sample ( $n=3,284,582$ ) had a gestational age of 31 weeks or longer. Third, where the magnitudes of the associations do not overlap, which generally occurred in the lowest gestational age range, the associations with GA are actually stronger for the offspring with siblings. The sensitivity analyses show that the sibling-comparison results that showed a reduction (e.g., with grades and educational attainment) or complete attenuation of the associations (e.g. suicide, low income, and receiving social benefits) are *not* due to a lower population-based estimate in offspring with siblings than in offspring without siblings. The one exception to this pattern of findings is for criminality, but the sibling-comparison results in the main analyses showed a robust, independent association.

**Mortality**

E7.1

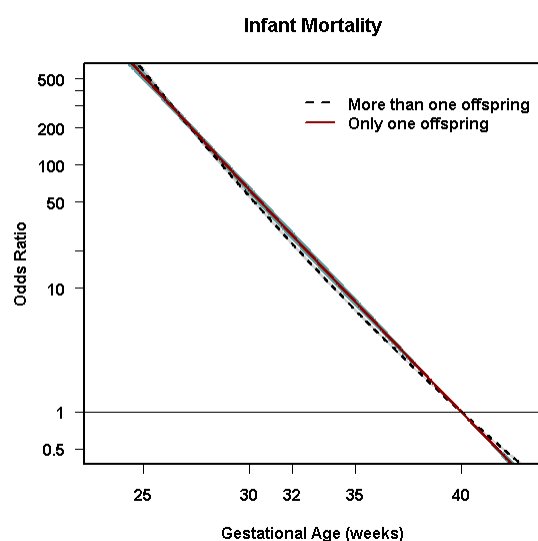

E7.2

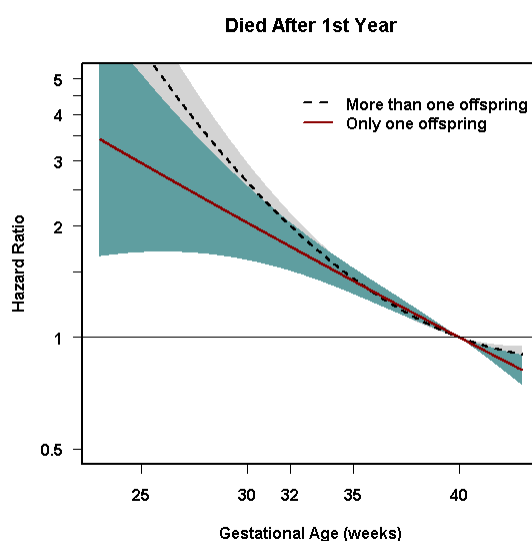



Psychiatric Morbidity

E7.3

Psychotic or Bipolar Disorder

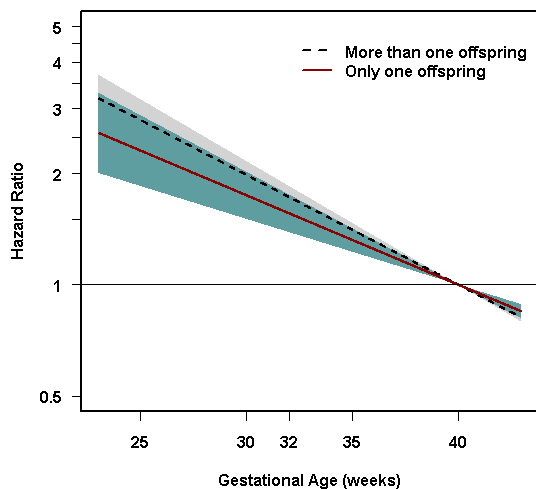

E7.4

Autism

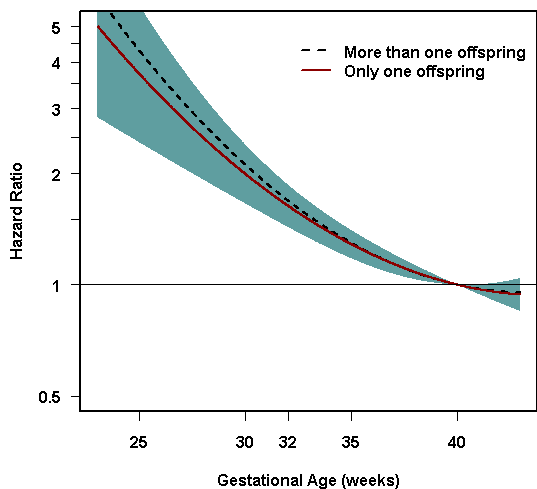

Psychiatric Morbidity (continued)

5.5

ADHD Diagnosis

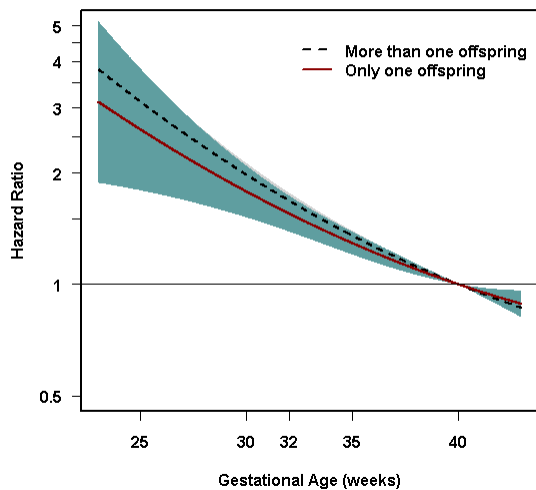

E7.6

Suicide Attempt

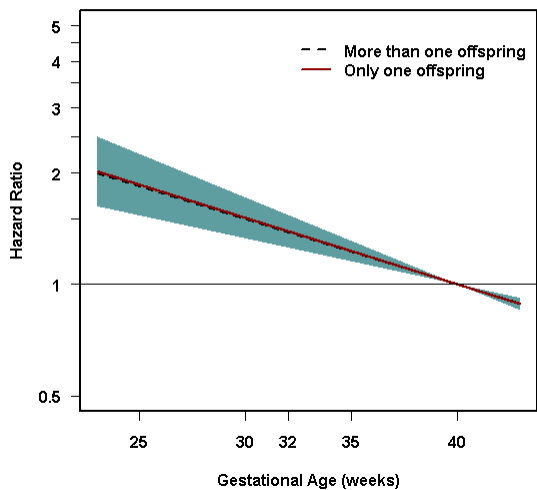

E7.7

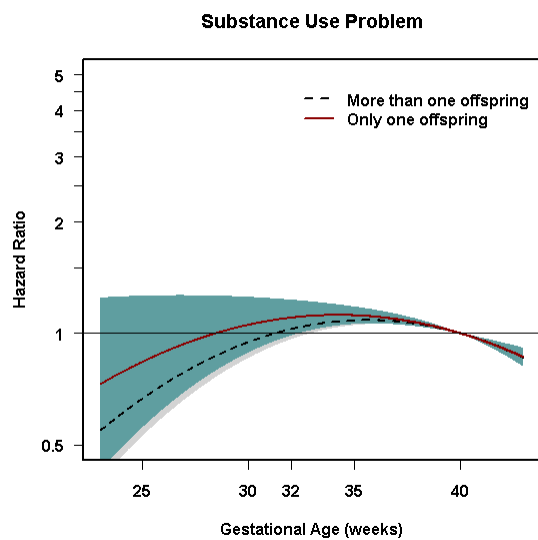

E7.8

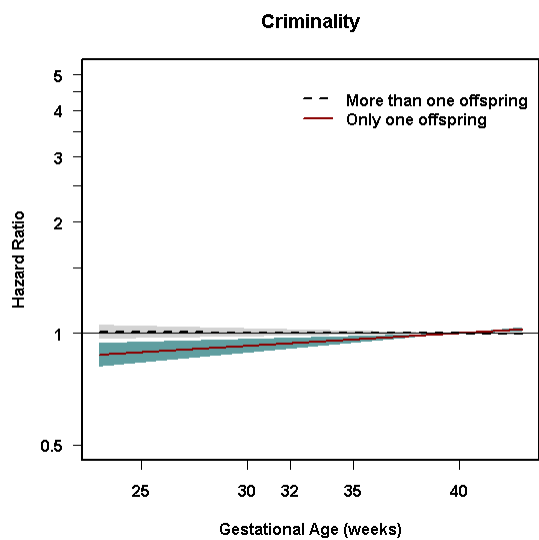

## Academic Problems

E7.9

Failing Grades

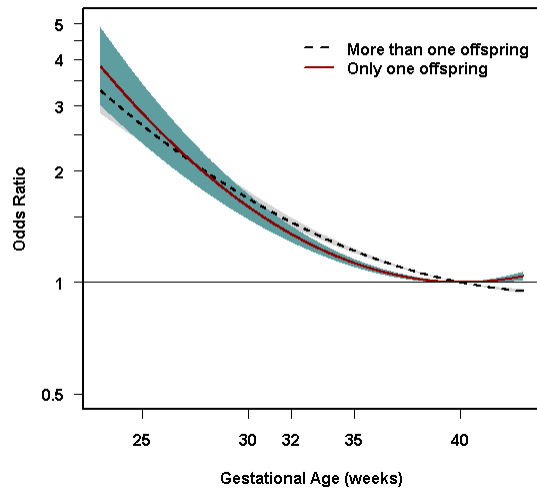

E7.10

Education under 10 yrs

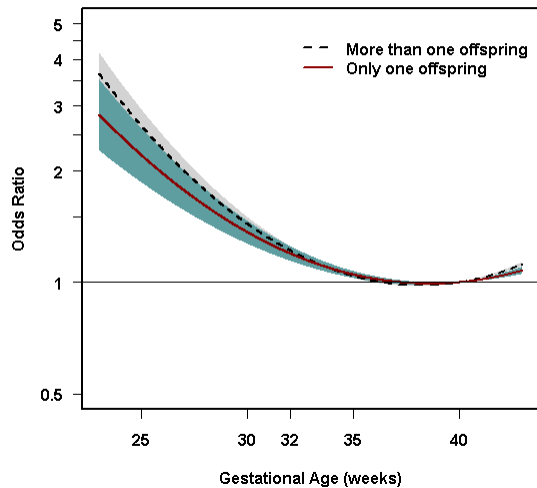

E7.11

Higher Education

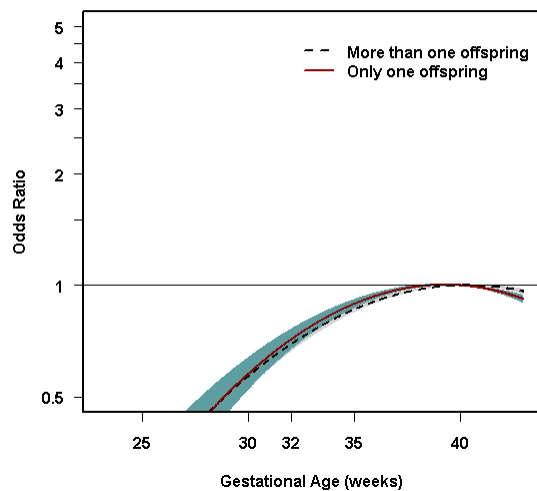

## Social Adversity

E7.12

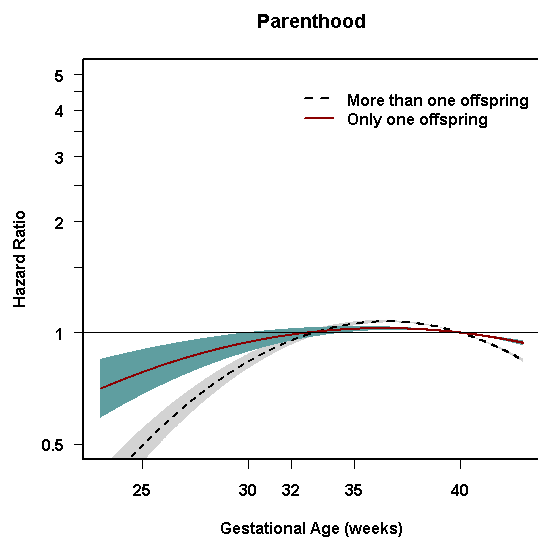

E7.13

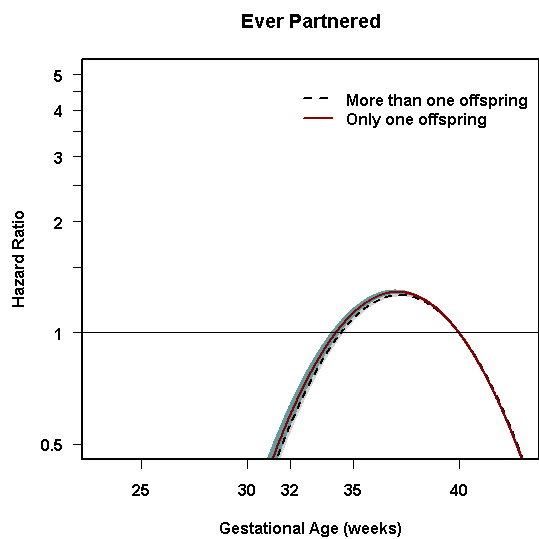

E7.14

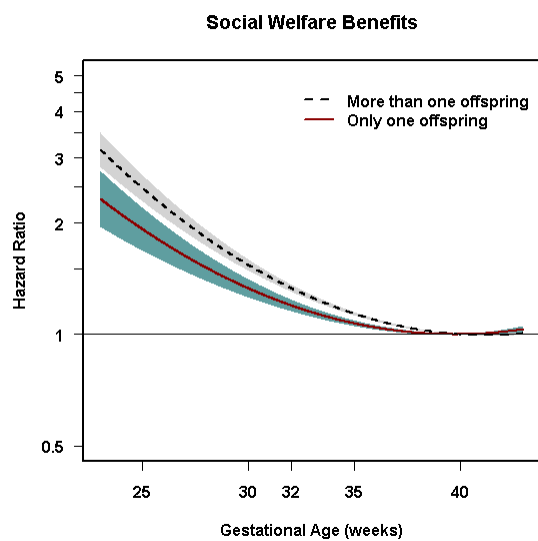

**E8. Results of cousin-comparison analyses of gestational age and offspring outcomes.**

The cohort in the main analysis consisted of N=3,300,708 individuals born to 1,736,735 unique mothers and 1,729,899 unique fathers. For the cousin comparison analysis, we used the Multigenerational Register to identify the maternal grandmothers of all offspring in the original cohort. Data for 331,972 individuals were excluded from this sensitivity analysis due to missing identifiers for the grandmothers. Thus, the final cohort for the cousin-comparisons consisted of N=2,968,736 offspring born to 1,542,984 unique mothers and 1,553,140 unique fathers with cousins clustered by 1,162,228 unique maternal grandmothers.

We fit two models for each outcome, the baseline and the fixed-effects models. It is important to note that the fixed-effects models in these analyses compared differentially exposed cousins (rather than siblings). The results are presented in Figure E8, where we plotted the baseline risk with the solid blue line. The cousin-comparison results are presented with the dotted blue lines, with the 95% confidence intervals represented by the shaded blue. Overall, the results of the cousin-comparison models are commensurate with the results from the sibling-comparison models. First, the association between GA and many of the outcomes remained robust when comparing differentially exposed cousins. Second and most important, though, the associations between GA and suicide attempts, school grades, educational attainment, and receiving social welfare benefits were all greatly attenuated in the cousin-comparison models, which are consistent with the siblings-comparison results. Carryover effects are arguably less of a concern when comparing cousins than when comparing siblings. Because the associations between GA and these outcomes were attenuated both in sibling- and cousin-comparisons the results strongly suggest that carry-over effects do not account for the attenuated associations with GA.

**E8. Figures. Comparison of the baseline and fixed-effects models for the association between continuous gestational age and offspring Mortality, Psychiatric Morbidity, Academic Problems, and Social Adversity.**

**Mortality**

E8.1

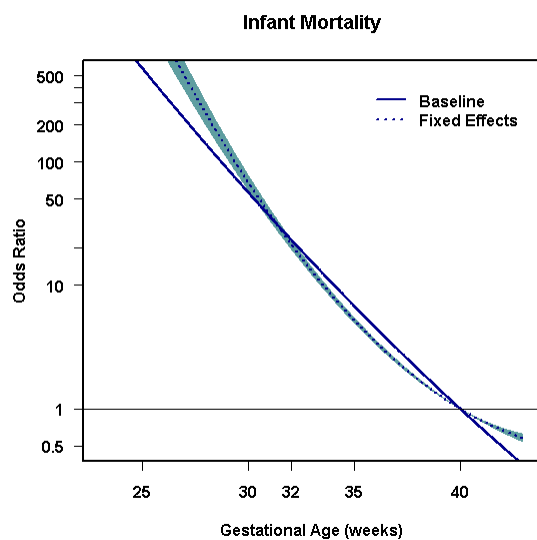

E8.2

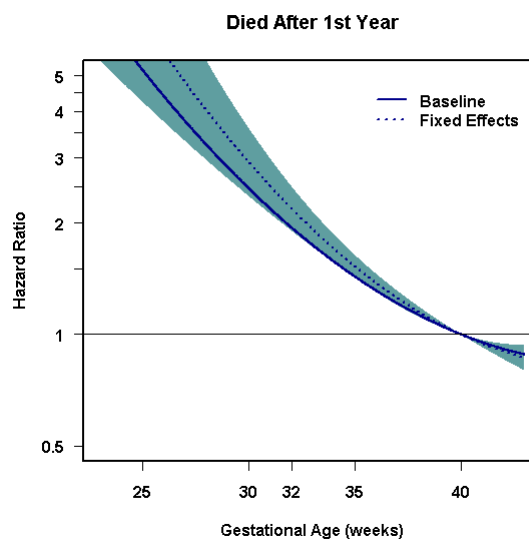

**Psychiatric Morbidity**

E8.3

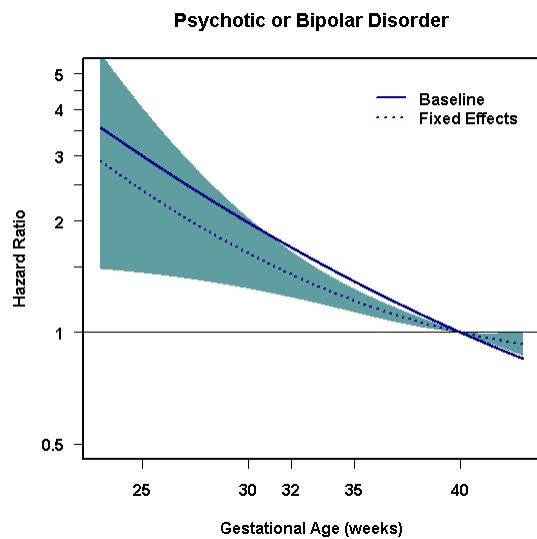

E8.4

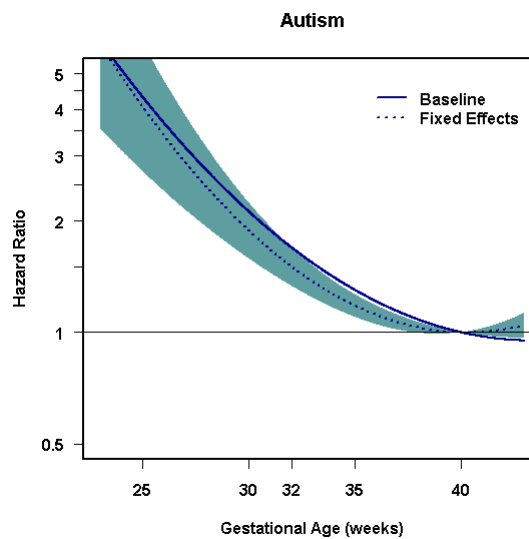

Psychiatric Morbidity (con't)  
E8.5

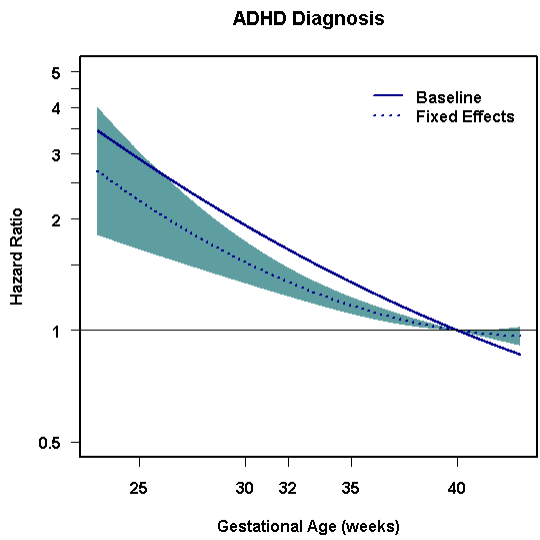

E8.6

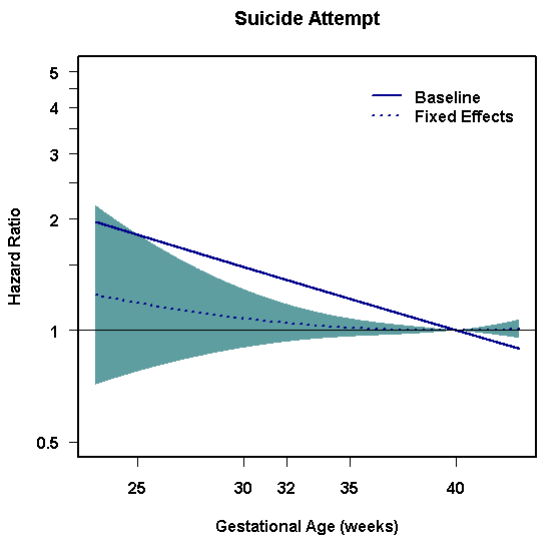

E8.7

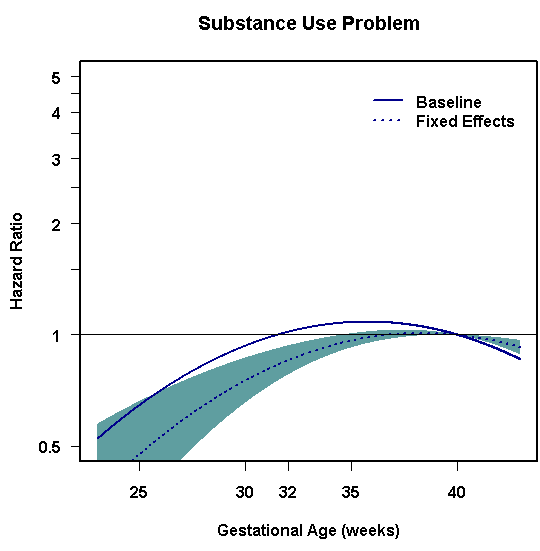

E8.8

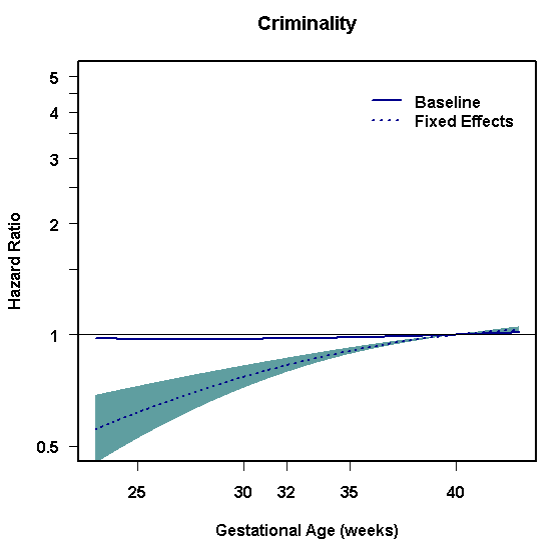

Academic Problems

E8.9

Failing Grades

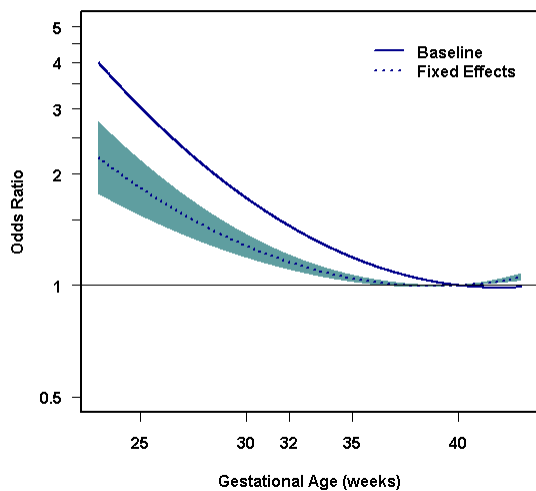

E8.10

Education under 10 yrs

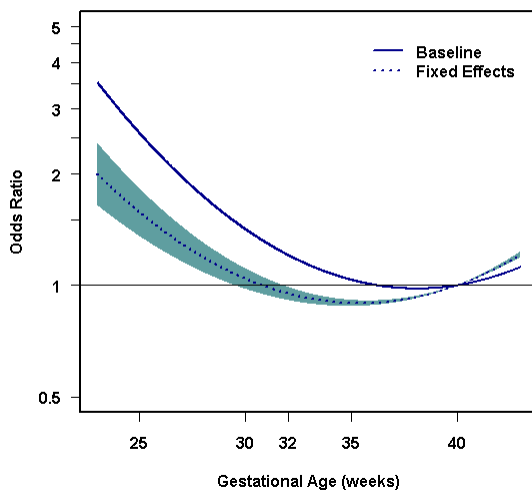

E8.11

Higher Education

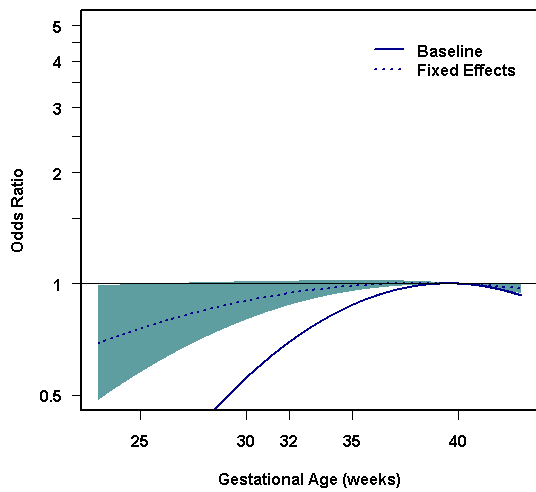



Social Adversity

E8.12

Parenthood

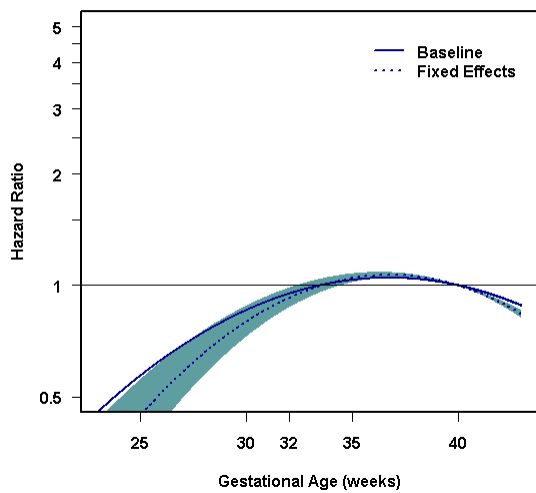

E8.13

Ever Partnered

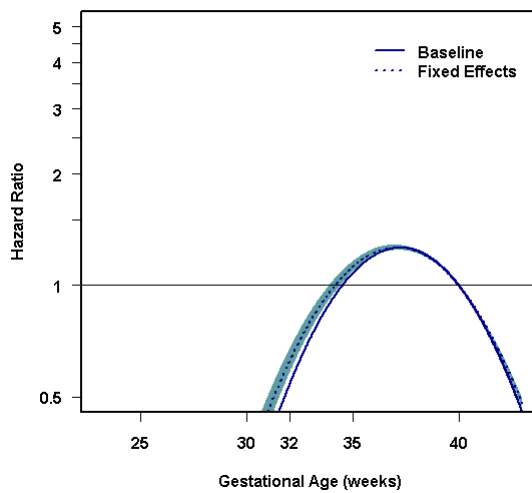

E8.14

Social Welfare Benefits

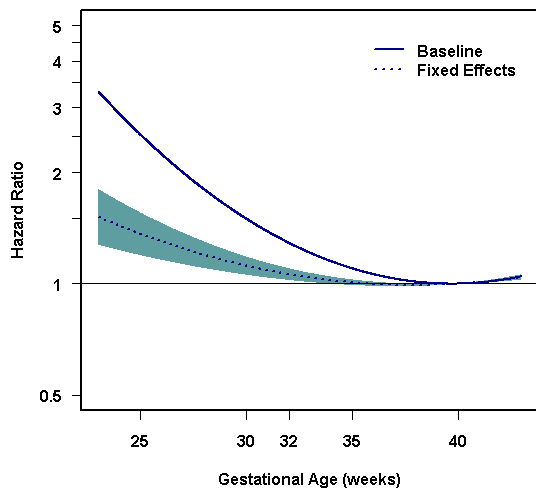

## E9. Bidirectional case-crossover analyses results.

Sibling-comparison designs, similar to most research approaches, assume that the exposure to a risk of one individual does not influence the outcome of another individual. In this particular study, the use of the design assumes that exposure to early GA of an individual does not influence the outcome for his/her siblings (i.e., carry-over effects). To help account for the influence of birth order in the main analyses we included the covariate in all analyses. To more specifically address the assumption of carryover effects, however, we conducted bidirectional case-crossover analyses, which explored whether different patterns of early gestational age within families (i.e., either the first- or second-born offspring had early gestational age) moderated the sibling-comparison results.<sup>12</sup> The results would suggest a carry-over effect if there was a smaller sibling-comparison estimate in families where the first sibling had an earlier GA than in families where the second sibling had an earlier gestational age. In families where the first-born offspring had an earlier gestational age, all subsequent children would be exposed to the risk factor throughout their lifetime—because all siblings would be exposed the comparison of the siblings would not yield a difference if there was a carryover effect. In contrast, in families where the second-born offspring had an earlier gestational age, the first-born offspring would not be exposed throughout their entire lifetime. We conducted sibling-comparison models in the first- and second-offspring of all of the families to examine the possibility of carryover effects using the same analytical approach as described in D’Onofrio et al.<sup>13</sup>

The initial cohort included data for N=3,300,708 offspring born in Sweden between 1973 and 2008 to 1,736,735 unique mothers. For the bi-directional case-crossover analysis we identified and retained data for 1,979,180 offspring who were all of the first- and second-born siblings from 989,590 sibling pairs. We then created a binary indicator variable that identified families in which the first-born sibling had an earlier gestational age than the second-born sibling (variable=1, n=457,615 pairs, 46.2% of the subsample). The remaining families, those where the second-born sibling had an earlier gestational age than the first-born sibling, were given a value=0.

We estimated two fixed-effects models in the analyses of each outcome variable. Both of the models for these sensitivity analyses used the continuous representation of gestational age (zero-centered re: week 40 and scaled in weeks). In the first model, each outcome was predicted by linear and quadratic gestational age (GA), plus all offspring-specific covariates. This model is identical to the fixed-effects model for the main analyses but is estimated on the reduced sample of first- and second-born siblings only. It is important to note the first model, which estimated two variables associated with GA (the linear and quadratic parameters), constrained the sibling-comparison parameters to be equal for all families, regardless of whether the first- or second-born siblings had an earlier gestational age. The second model included the same set of predictors plus two additional parameters representing (1) the interaction of linear GA with the binary variable (described above) that indicated whether the first- or second-born sibling had a shorter GA and (2) the interaction of quadratic GA with the binary variable described above. The second model, which estimated four variables associated with GA, provides a model parameterization equal to estimating separate linear and quadratic models for the two groups of families (one model for families in which the first-born had an earlier gestational age and one model for families in which the second-born had an earlier gestational age). We then compared the fit indices of the two models. The model fit comparisons provided a direct comparison of a model that specified the same association with GA across all families with a model that allowed the association with GA to differ in the two groups of siblings. Finally, we plotted the sibling-comparison results separately for the two groups to examine the pattern of the findings and further explore the possibility of carry-over effects.

Table E9 presents the model fit statistics (Akaike’s Information Criterion; AIC) for the two models. The differenced  $\Delta$ AIC in the final column equals the AIC for the model that includes the interaction minus AIC for the model without the interaction. The results suggest that adding the interaction terms (and thus fitting a separate model in each type of family) did not fit the data better for most of the outcome variables (where  $\Delta$ AIC is  $> -2$ ). The models could not be fit to the parenthood data because of the small sample sizes when separating the fixed effects models into separate groups based on the timing of the early GA. There are two outcome variables where the model fitting suggested two separate associations fit the data better—infant mortality and failing grades. The model comparisons for psychotic and bipolar disorder were also marginal.

To get a better sense of the results we present a number of panels in Figure E9. For each outcome variable the left panel presents the basic baseline model and the fixed-effects results for the subsample that only included the first- and second-born offspring. The fixed-effects results in the left panel present the model fitting where the sibling-comparisons were held constant for all of the families. It is important to note that the sibling-comparison results are consistent with those run on the entire sample in the main text, which included all offspring. In panel B, the figure presents the fixed-effects results separately for (a) families in which the first-born child had an earlier GA and (b) families in which the second-born child had an earlier GA.

When predicting infant mortality, the bidirectional case-crossover analyses suggest that the association was actually larger in families where the first-born offspring had the earlier GA, which is contrary to the presence of a carryover effect. It is important to note, however, that early GA was strongly associated with infant mortality in both types of families, supporting the substantive conclusion from the main analyses. When predicting low education, the sibling-comparison estimates were lower in families where the first-born offspring had the earlier GA than in families where the second-born offspring had the earlier GA. This is the pattern of findings that would be predicted for a carryover effect. When predicting psychotic and bipolar disorder, the pattern of results provided marginal support for fitting separate associations in the two groups. When exploring the pattern of the results in panel B, the association between earlier GA and psychotic and bipolar disorder were actually somewhat larger in families where the first-born had the earlier GA—this pattern is contrary to what would be predicted from a carryover effect. Shorter GA was associated with psychotic and bipolar disorder in both groups, however, supporting the findings from the main analyses.

Bidirectional, case-crossover analyses do not rule out the possibility of carryover effects, but the results of the analyses are not consistent with carryover effects for most of the outcome variables. The lone exception is low educational attainment. Because we are making so many model comparisons (and running multiple models), the lower sibling-comparison estimate in families where the first-born sibling had an earlier gestational age for this one outcome could be a statistical artifact of the multiple testing in this project. Future research, including more sibling-comparison studies and quasi-experimental research using other designs, will need to further explore the associations between gestational age and offspring mortality and morbidity, especially with low educational attainment.

**Table E9. Model AIC fit indices.**

|                              | Outcome                         | Model                                                        |                  | $\Delta$ AIC |
|------------------------------|---------------------------------|--------------------------------------------------------------|------------------|--------------|
|                              |                                 | without interaction                                          | with interaction |              |
| <b>Mortality</b>             | Infant Mortality                | 6,769.7                                                      | 6,761.3          | -8.4         |
|                              | Died After 1 <sup>st</sup> Year | 8,744.8                                                      | 8,747.8          | 3.1          |
| <b>Psychiatric Morbidity</b> | Psychotic or Bipolar Disorder   | 8,877.2                                                      | 8,875.4          | -1.9         |
|                              | Autism                          | 8,451.1                                                      | 8,453.2          | 2.1          |
|                              | ADHD Diagnosis                  | 13,469.6                                                     | 13,473.1         | 3.5          |
|                              | Suicide Attempt                 | 16,031.4                                                     | 16,033.6         | 2.2          |
|                              | Substance Use Problem           | 27,190.4                                                     | 27,192.3         | 1.9          |
|                              | Criminality                     | 147,246.1                                                    | 147,248.6        | 2.5          |
| <b>Academic Problems</b>     | Failing Grades                  | 97,121.5                                                     | 97,125.1         | 3.6          |
|                              | Education under 10 yrs          | 150,368.4                                                    | 150,342.5        | -25.9        |
|                              | Higher Education                | 73,242.5                                                     | 73,501.2         | 258.7        |
| <b>Social Adversity</b>      | Parenthood                      | --- parameter estimates were numerically unstable or NAN --- |                  |              |
|                              | Ever Partnered                  | 73,910.5                                                     | 41,698.7         | -32,211.9    |
|                              | Social Welfare Benefits         | 145,422.1                                                    | 145,422.3        | 0.2          |

Note. The model selection table compares the AICs for the model without interactions (constraining the parameters associated with gestational age to be the same regardless of the order of lower gestational age within siblings pairs) with the model with interactions (which estimated separate associations between gestational age and the outcome for families where the first-born and second-born siblings had early gestational age). The column labeled “AIC-min choice” indicates which of the two candidate models yielded the lowest AIC. The observed difference,  $\Delta$ AIC =  $AIC_{Interactions} - AIC_{No\ int}$ , provides a measure of relative merit that is free of scaling constants and can be interpreted as strength of evidence for model selection purposes.<sup>11</sup> For most variables the rescaled difference  $|\Delta$ AIC| > -2 (small) indicates substantial support for equivalent sibling-comparison parameters in both groups. By contrast, outcomes with  $|\Delta$ AIC| < -2 indicate that the models with the interactions (fitting separate associations in the two groups of families) was a better fit to the data. To better interpret the results, Figure E9 presents the associations for the different models.

### E9.Figures. Bidirectional case-crossover analyses figures.

Figures in the left-hand column (a) compare the population-based estimate of the association between gestational age and the outcome (solid red curve labeled “Baseline”) and the fixed-effects for the entire subsample (dotted blue curve labeled “Fixed-effects”, with the 95% confidence interval presented as shaded blue) in the subsample that only included first- and second-born siblings. The modeling results are consistent with those estimated in the full cohort. Figures in the right-hand column (b) show two conditional fixed-effects (CFE) models; one estimated on the sample of siblings for whom the first-born had shorter gestational age than the second-born (long-dash line labeled “First born earlier GA”). The other CFE model was estimated on the sample of siblings for whom the second born had shorter gestational age (dotted blue line labeled “Second-born shorter GA with 95% confidence region shaded dark grey”).

#### Mortality

##### E9.1

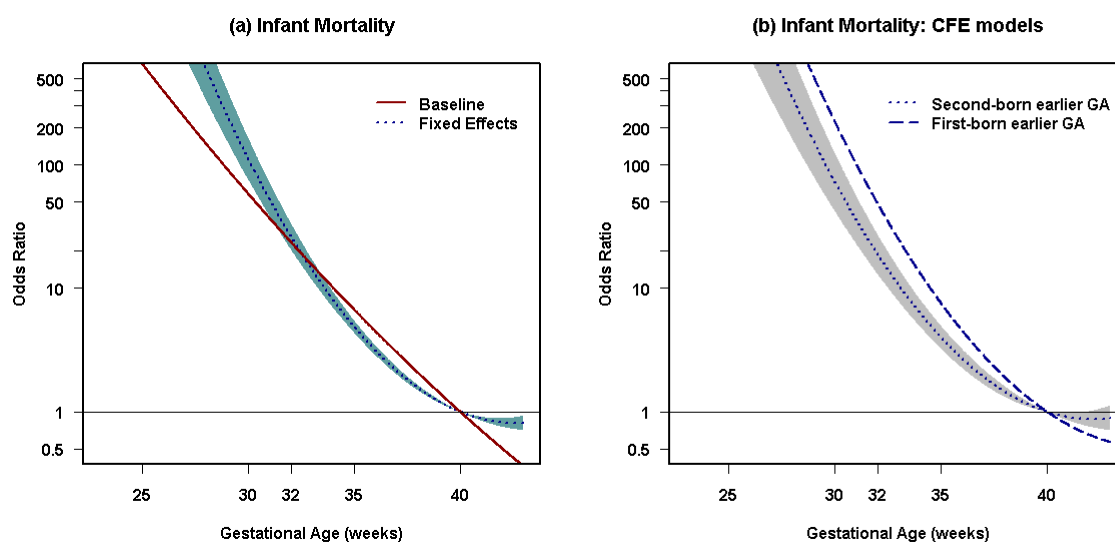

##### E9.2

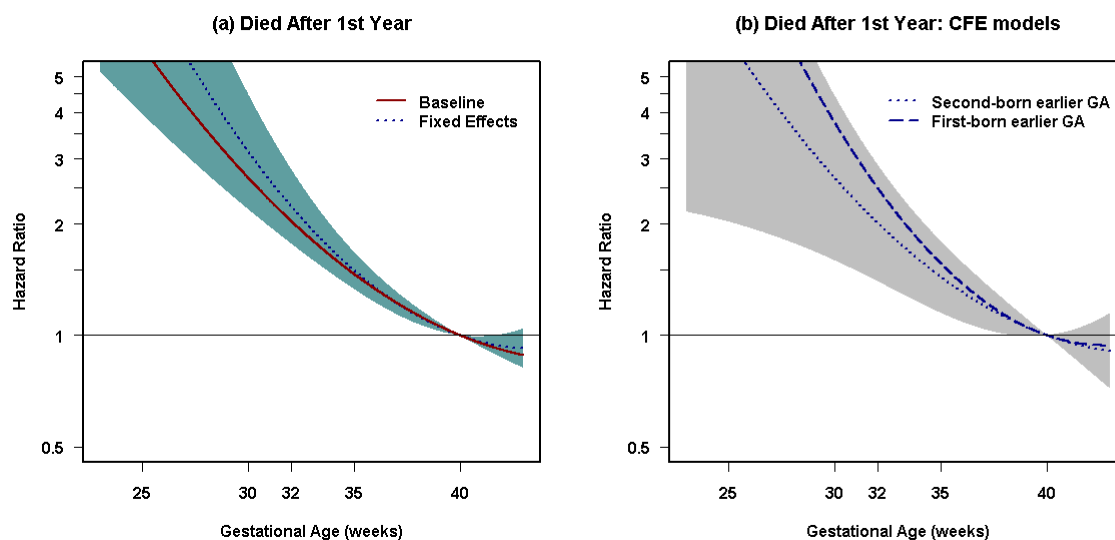

Psychiatric Morbidity

E9.3

(a) Psychotic or Bipolar Disorder

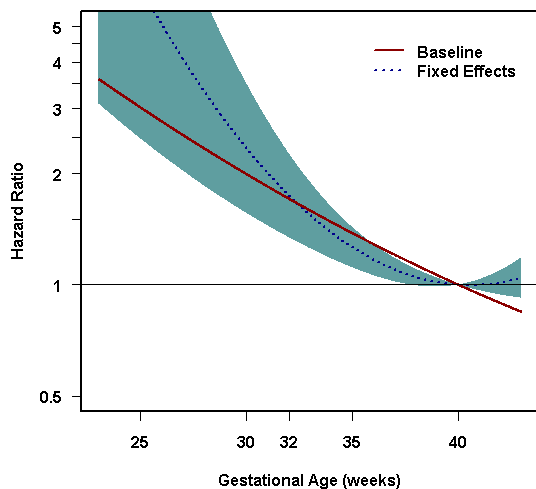

(b) Psychotic or Bipolar Disorder: CFE models

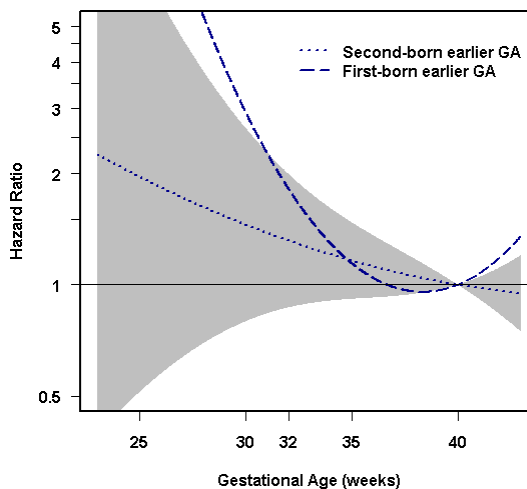

E9.4

(a) Autism

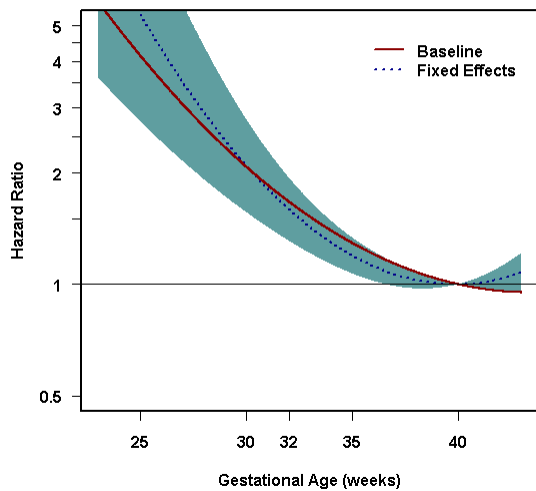

(b) Autism: CFE models

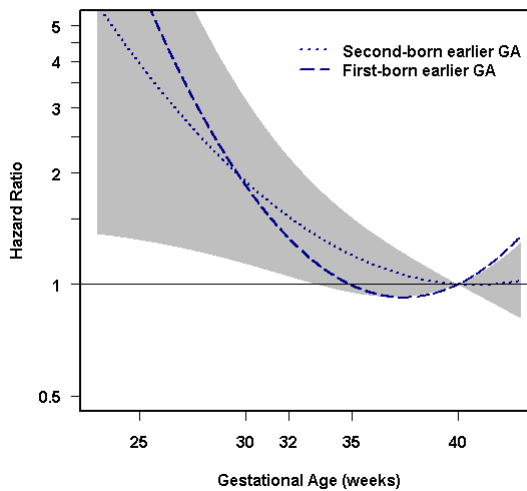

## Psychiatric Morbidity (continued)

## E9.5

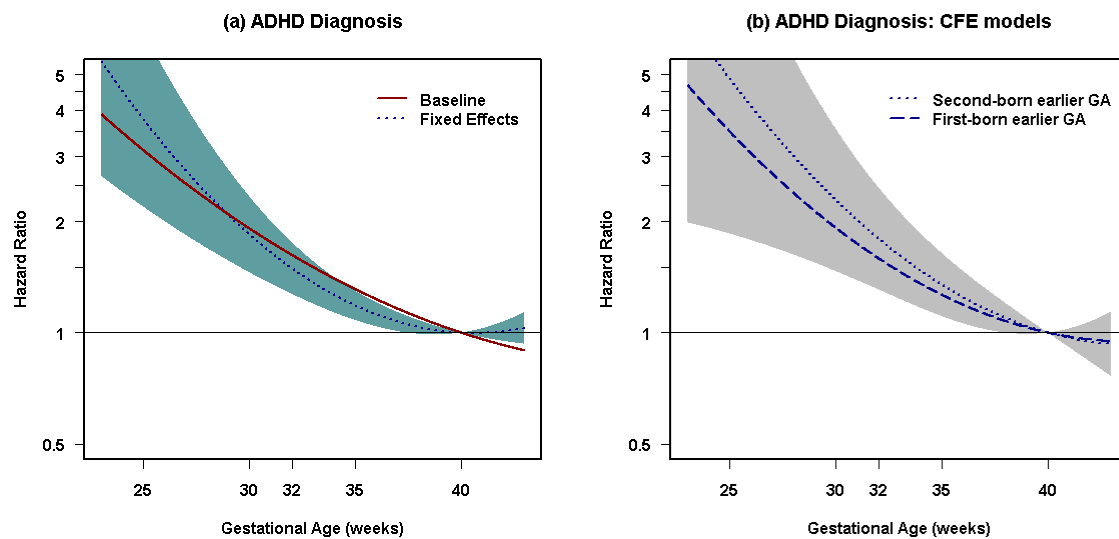

## E9.6

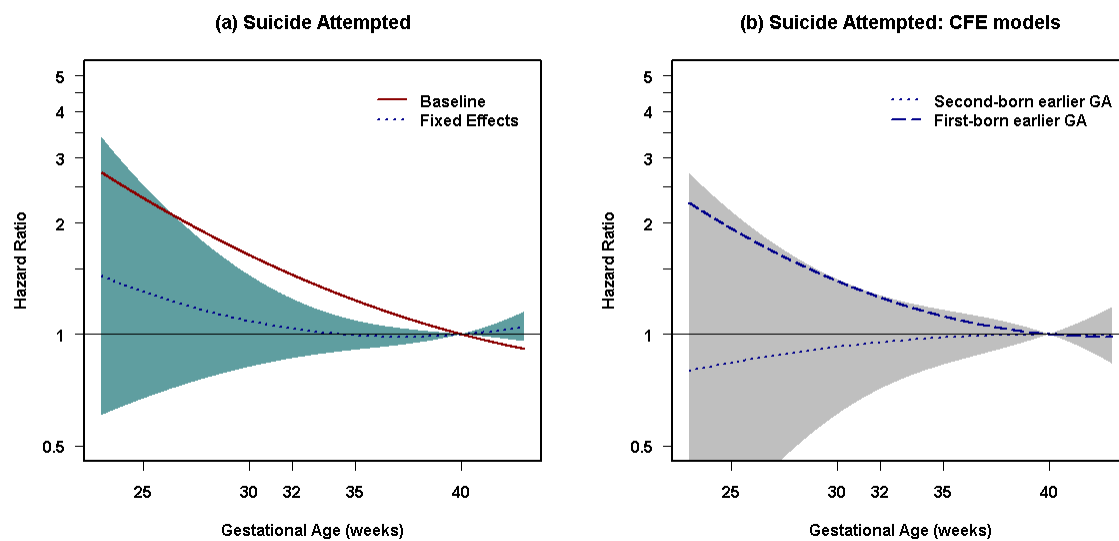

## Psychiatric Morbidity (continued)

## E9.7

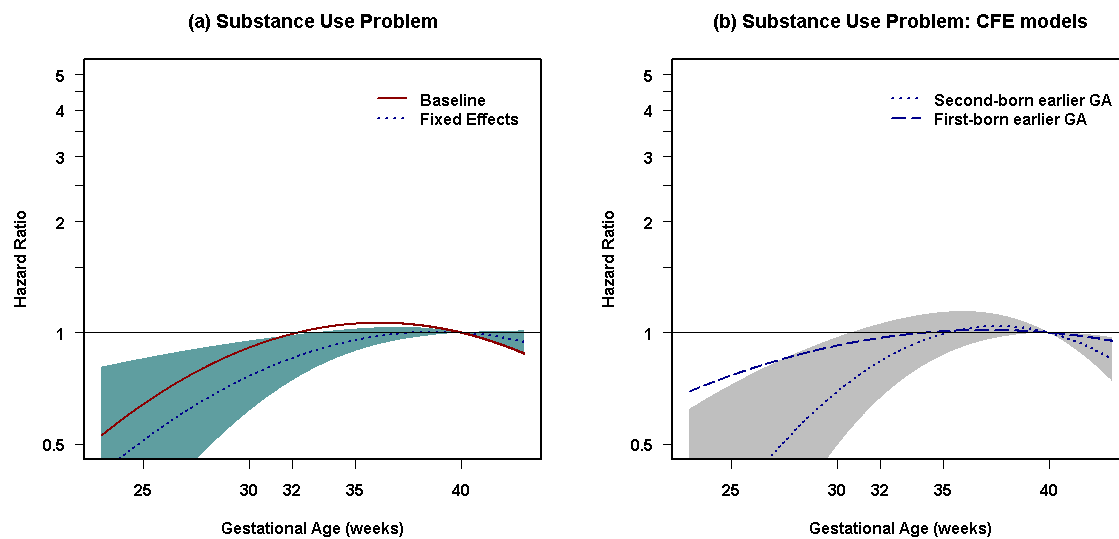

## E9.8

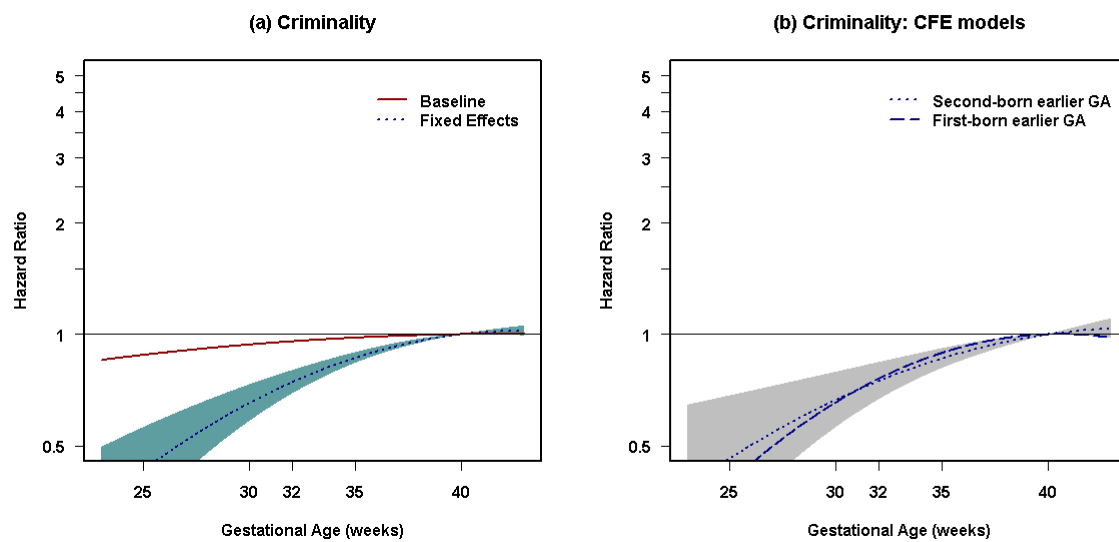



## E9.9

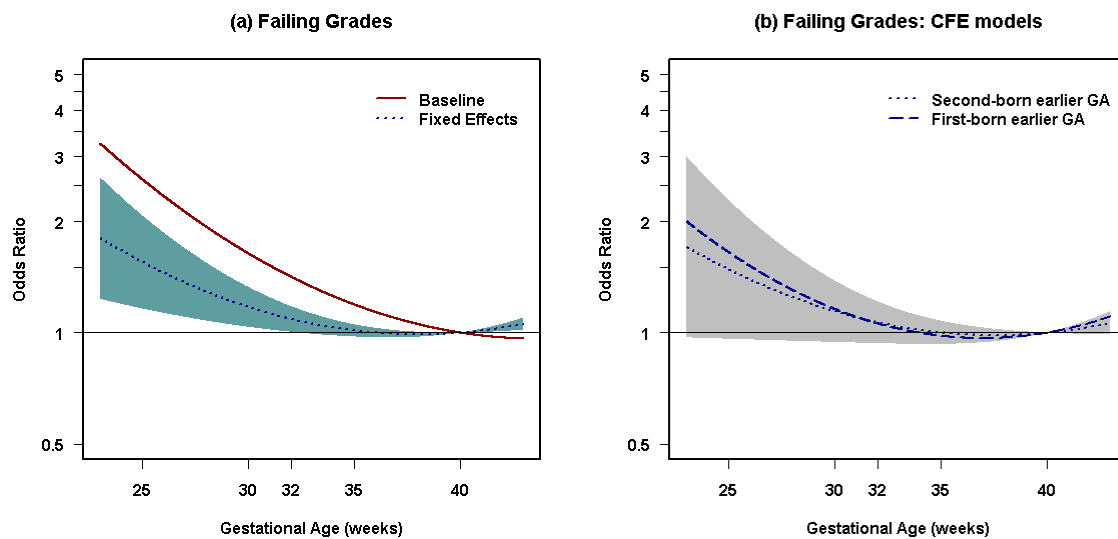

## E9.10

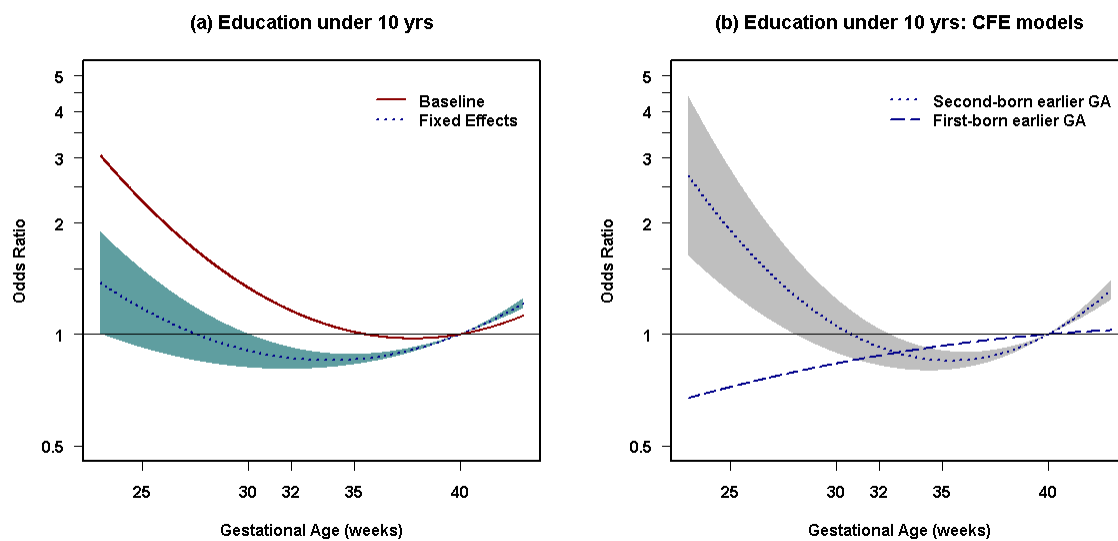

## Academic Problems (continued)

## E9.11

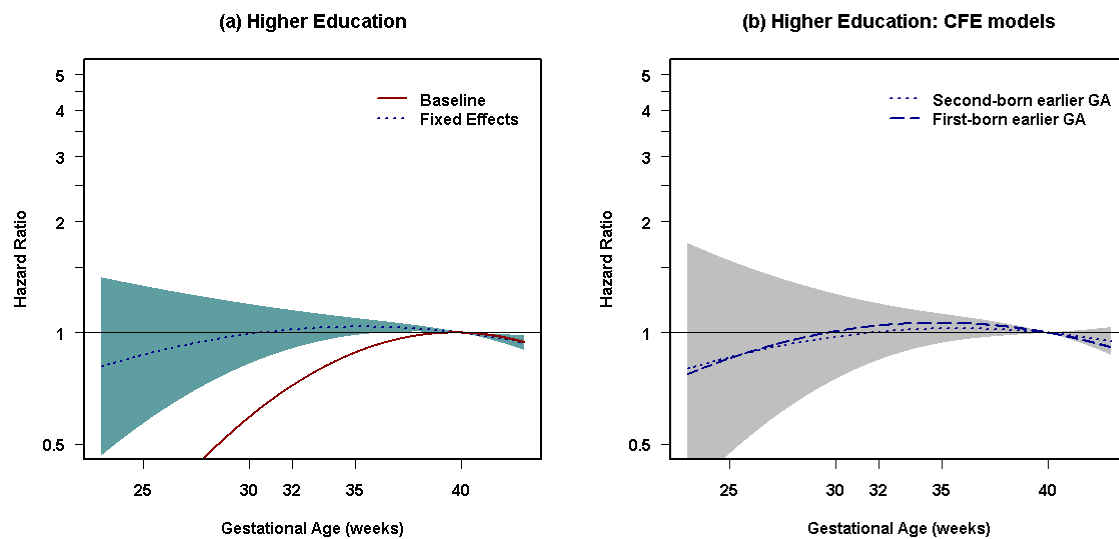

## Social Adversity

## E9.12 Parenthood (problem with covariance matrix estimation)

Social Adversity (continued)

E9.13

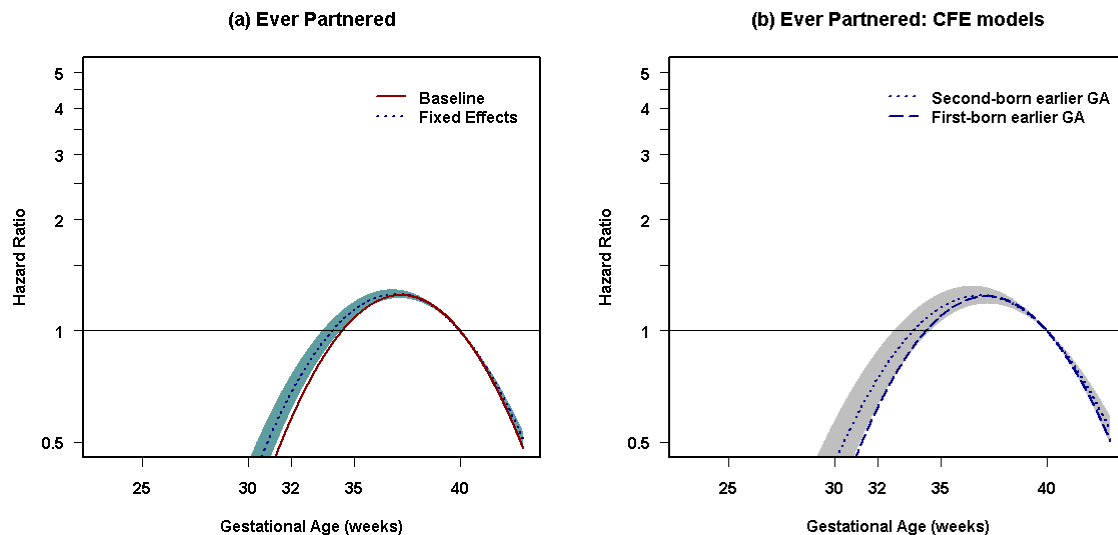

E9.14

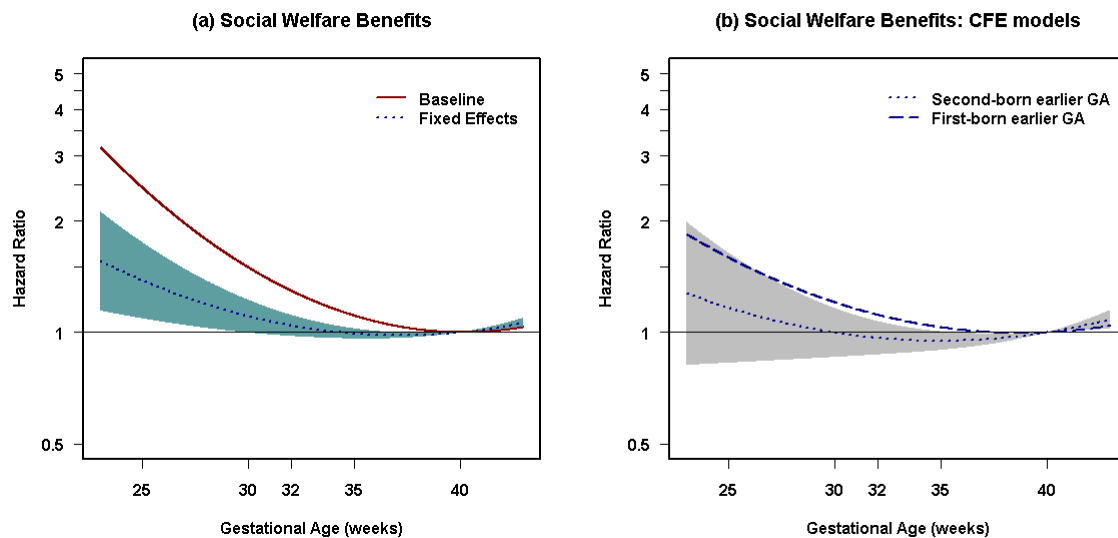

### E10. Analyses exploring the moderating effect of year of birth on the association between gestational age and infant mortality.

We examined whether the association between gestational age and infant mortality has changed across the time span of the study to see if the results were consistent with previous research.<sup>14</sup> We fit the three main models in the main text (the baseline, adjusted, and fixed-effects models) while estimating the linear association between gestational age and infant mortality. Each model estimated the main effect of gestational age and an interaction between gestational age and year of birth. All of the models also included the main effect of year of birth.

The model fitting results are presented in Table E10. To help with the interpretation we present the estimated Odds Ratios associated with gestational age for four years (1975, 1985, 1995, and 2005). As Figure E.9.1 illustrates the magnitude of the association between gestational age and infant mortality decreased across the time span, consistent with previous research.<sup>14</sup> Figure E.9.2 presents the association between gestational age and infant mortality for the four years using the parameters from the fixed-effects models. The results show the association between gestational age and infant mortality remains when controlling for selection factors shared by siblings and measured covariates, and the magnitude of the association decreased somewhat during the time span.

**Table E10. Model fitting results from models exploring whether year of birth moderated the association between gestational age and infant mortality.**

| Parameter                     | Model 1 |        |         | Model 2 |        |         | Model 3 |        |         |
|-------------------------------|---------|--------|---------|---------|--------|---------|---------|--------|---------|
|                               | b       | SE     | p       | b       | SE     | p       | b       | SE     | p       |
| Gestational age               | -0.4449 | 0.0033 | <0.0001 | -0.4229 | 0.0035 | <0.0001 | -0.3704 | 0.0119 | <0.0001 |
| Gestational age*year of birth | 0.0024  | 0.0002 | <0.0001 | 0.0017  | 0.0002 | <0.0001 | 0.0014  | 0.0007 | 0.0348  |

Note. Year of birth was referenced at 1973.

**Figure E.9. Predicted odds ratio for infant mortality associated with gestational age by year of birth.**

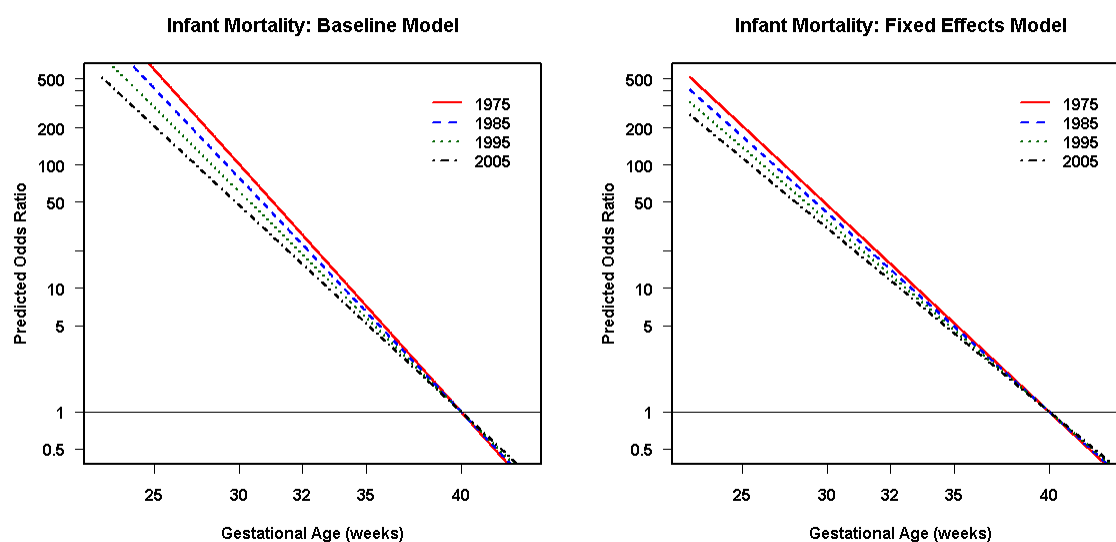

Note. Both figures present the predicted linear association between gestational age (referenced at 40 weeks) and infant mortality. The figures present the predicted odds ratios based on the baseline model (the left panel) and fixed-effects model (the right panel) for four years to illustrate the moderating effect of year of birth on the association between gestational age and year of birth.

### E11. Comparison of the baseline and fixed-effects models with ordinal grouping of gestational age after dropping observations with extreme values on birth weight

The tables below present the unstandardized regression coefficients (with standard errors) and the point estimates (either Odds Ratios or Hazard Ratios, with the 95% confidence intervals) associated with the ordinal bins of gestational age. The models were based on a dataset that dropped an additional 8,935 offspring who were less than 6 standard deviations below the mean birth weight for the week of gestation or above 3 standard deviations above the mean birth weight for the week of gestation. The approach has been used by researchers before when analyzing gestational age in the Swedish Registers,<sup>15</sup> based on previous research suggesting that observations with extreme values in birth weight (relative to their gestational age) are errors.<sup>16</sup>

For all of the outcomes included in the study the results of the baseline and fixed-effects models based on the subset of the data are commensurate to those presented in the main text. The magnitude of the associations are comparable, with the point estimates all falling well within the confidence intervals of the estimates presented in Appendix 3.0. The confidence intervals around the point estimates for the binned analyses for parenthood are quite large in Table E11. As such, we reran the baseline and fixed effects models in the subset of the data using a quadratic model (considering GA to be continuous), and the results are commensurate with those presented in the main analyses (full results available upon request).

In sum, running the models on a subset of the data that excluded offspring with extreme values of birth weight relative to their gestational age provided commensurate results. The pattern of the associations and the magnitude of the point estimates were consistent with the main analyses.

**Table E11.1 Maximum likelihood (ML) estimates for the baseline and fixed-effects models with ordinal gestational age (GA) predicting offspring mortality outcomes.**

| Outcome             | Model         | GA Category (wks) | b      | SE     | ChiSq     | Pr > ChiSq | Point Estimate | 95% CL  |         |
|---------------------|---------------|-------------------|--------|--------|-----------|------------|----------------|---------|---------|
|                     |               |                   |        |        |           |            |                | Lower   | Upper   |
| Infant Mortality    | Baseline      | 23-27             | 5.734  | 0.031  | 34098.386 | <.0001     | 309.32         | 291.055 | 328.732 |
|                     |               | 28-30             | 4.333  | 0.031  | 19474.956 | <.0001     | 76.19          | 71.692  | 80.971  |
|                     |               | 31-33             | 3.219  | 0.030  | 11690.960 | <.0001     | 25.001         | 23.584  | 26.503  |
|                     |               | 34-36             | 1.913  | 0.025  | 5793.106  | <.0001     | 6.771          | 6.445   | 7.112   |
|                     | Fixed-effects | 23-27             | 5.570  | 0.195  | 813.357   | <.0001     | 262.308        | 178.888 | 384.629 |
|                     |               | 28-30             | 4.10   | 0.139  | 868.717   | <.0001     | 60.041         | 45.728  | 78.834  |
|                     |               | 31-33             | 2.914  | 0.097  | 894.849   | <.0001     | 18.425         | 15.223  | 22.3    |
|                     |               | 34-36             | 1.702  | 0.057  | 885.758   | <.0001     | 5.487          | 4.905   | 6.138   |
| Died After 1st Year | Baseline      | 23-27             | 1.1021 | 0.1926 | 32.736    | <.0001     | 3.011          | 2.064   | 4.391   |
|                     |               | 28-30             | 0.8276 | 0.1234 | 44.974    | <.0001     | 2.288          | 1.796   | 2.914   |
|                     |               | 31-33             | 0.7148 | 0.0739 | 93.647    | <.0001     | 2.044          | 1.768   | 2.362   |
|                     |               | 34-36             | 0.437  | 0.0377 | 134.567   | <.0001     | 1.548          | 1.438   | 1.666   |
|                     | Fixed-effects | 23-27             | 1.342  | 0.380  | 12.455    | 0.0004     | 3.827          | 1.816   | 8.064   |
|                     |               | 28-30             | 1.225  | 0.253  | 23.439    | <.0001     | 3.404          | 2.073   | 5.59    |
|                     |               | 31-33             | 0.776  | 0.141  | 30.003    | <.0001     | 2.172          | 1.646   | 2.867   |
|                     |               | 34-36             | 0.486  | 0.070  | 47.235    | <.0001     | 1.626          | 1.416   | 1.868   |

Note. The GA (gestational age) reference group included offspring born between 37 weeks and 42 weeks and 6 days. For each group, the table lists the unstandardized regression coefficients (b), the standard error of the estimate (SE), Chi Square statistics, regression coefficients converted to either a hazard ratio (for all right-censored outcomes) or an odds ratio (for logistic outcomes), and 95% confidence limits on the point estimate of the model.

**Table E11.2. ML estimates for the baseline and fixed-effects models with ordinal gestational age (GA) predicting offspring *psychiatric morbidity*.**

| Outcome                       | Model         | GA Category (wks) | b      | SE    | ChiSq  | Pr > ChiSq | Point Estimate | 95% CL |        |
|-------------------------------|---------------|-------------------|--------|-------|--------|------------|----------------|--------|--------|
|                               |               |                   |        |       |        |            |                | Lower  | Upper  |
| Psychotic or Bipolar Disorder | Baseline      | 23-27             | 1.229  | 0.179 | 46.948 | <.0001     | 3.418          | 2.405  | 4.858  |
|                               |               | 28-30             | 0.843  | 0.110 | 58.753 | <.0001     | 2.324          | 1.873  | 2.883  |
|                               |               | 31-33             | 0.425  | 0.074 | 32.509 | <.0001     | 1.531          | 1.323  | 1.773  |
|                               |               | 34-36             | 0.218  | 0.036 | 36.432 | <.0001     | 1.244          | 1.159  | 1.335  |
|                               | Fixed-effects | 23-27             | 1.316  | 0.544 | 5.838  | 0.0157     | 3.731          | 1.282  | 10.856 |
|                               |               | 28-30             | 1.050  | 0.268 | 15.271 | <.0001     | 2.86           | 1.688  | 4.845  |
|                               |               | 31-33             | 0.177  | 0.158 | 1.253  | 0.263      | 1.194          | 0.875  | 1.628  |
|                               |               | 34-36             | 0.112  | 0.075 | 2.213  | 0.1368     | 1.119          | 0.965  | 1.298  |
| Autism                        | Baseline      | 23-27             | 1.273  | 0.127 | 99.708 | <.0001     | 3.572          | 2.782  | 4.585  |
|                               |               | 28-30             | 0.817  | 0.130 | 39.146 | <.0001     | 2.265          | 1.753  | 2.926  |
|                               |               | 31-33             | 0.471  | 0.097 | 23.490 | <.0001     | 1.603          | 1.324  | 1.94   |
|                               |               | 34-36             | 0.338  | 0.048 | 48.08  | <.0001     | 1.402          | 1.274  | 1.543  |
|                               | Fixed-effects | 23-27             | 1.551  | 0.466 | 11.049 | 0.0009     | 4.719          | 1.89   | 11.779 |
|                               |               | 28-30             | 1.289  | 0.363 | 12.579 | 0.0004     | 3.63           | 1.78   | 7.402  |
|                               |               | 31-33             | 0.310  | 0.252 | 1.516  | 0.2182     | 1.364          | 0.832  | 2.237  |
|                               |               | 34-36             | 0.307  | 0.126 | 5.900  | 0.0151     | 1.359          | 1.061  | 1.742  |
| ADHD Diagnosis                | Baseline      | 23-27             | 1.028  | 0.106 | 93.65  | <.0001     | 2.797          | 2.271  | 3.445  |
|                               |               | 28-30             | 0.817  | 0.096 | 71.645 | <.0001     | 2.265          | 1.874  | 2.737  |
|                               |               | 31-33             | 0.583  | 0.067 | 73.860 | <.0001     | 1.793          | 1.569  | 2.048  |
|                               |               | 34-36             | 0.297  | 0.036 | 66.530 | <.0001     | 1.347          | 1.254  | 1.447  |
|                               | Fixed-effects | 23-27             | 0.646  | 0.295 | 4.795  | 0.0285     | 1.91           | 1.07   | 3.407  |
|                               |               | 28-30             | 0.725  | 0.266 | 7.419  | 0.0065     | 2.067          | 1.226  | 3.485  |
|                               |               | 31-33             | 0.554  | 0.192 | 8.302  | 0.004      | 1.742          | 1.194  | 2.54   |
|                               |               | 34-36             | 0.077  | 0.097 | 0.634  | 0.4256     | 1.081          | 0.893  | 1.309  |
| Suicide Attempt               | Baseline      | 23-27             | 0.616  | 0.179 | 11.767 | 0.0006     | 1.852          | 1.302  | 2.634  |
|                               |               | 28-30             | 0.427  | 0.105 | 16.383 | <.0001     | 1.533          | 1.247  | 1.886  |
|                               |               | 31-33             | 0.245  | 0.065 | 14.223 | 0.0002     | 1.278          | 1.125  | 1.452  |
|                               |               | 34-36             | 0.167  | 0.029 | 32.183 | <.0001     | 1.182          | 1.116  | 1.252  |
|                               | Fixed-effects | 23-27             | 0.147  | 0.356 | 0.172  | 0.6778     | 1.159          | 0.577  | 2.33   |
|                               |               | 28-30             | 0.165  | 0.217 | 0.576  | 0.4478     | 1.18           | 0.77   | 1.807  |
|                               |               | 31-33             | -0.163 | 0.125 | 1.68   | 0.1949     | 0.85           | 0.664  | 1.087  |
|                               |               | 34-36             | 0.006  | 0.055 | 0.012  | 0.9095     | 1.006          | 0.902  | 1.123  |
| Substance Use Problem         | Baseline      | 23-27             | -0.707 | 0.176 | 15.986 | <.0001     | 0.493          | 0.349  | 0.697  |
|                               |               | 28-30             | 0.082  | 0.085 | 0.927  | 0.3356     | 1.086          | 0.918  | 1.284  |
|                               |               | 31-33             | 0.076  | 0.053 | 2.056  | 0.1515     | 1.08           | 0.972  | 1.2    |
|                               |               | 34-36             | 0.067  | 0.024 | 7.593  | 0.0059     | 1.07           | 1.02   | 1.123  |
|                               | Fixed-effects | 23-27             | -0.766 | 0.267 | 8.209  | 0.0042     | 0.465          | 0.275  | 0.785  |
|                               |               | 28-30             | -0.292 | 0.146 | 3.960  | 0.0466     | 0.747          | 0.56   | 0.996  |
|                               |               | 31-33             | -0.091 | 0.094 | 0.938  | 0.3327     | 0.913          | 0.759  | 1.098  |
|                               |               | 34-36             | -0.116 | 0.043 | 7.100  | 0.0077     | 0.89           | 0.817  | 0.97   |
| Criminality                   | Baseline      | 23-27             | -0.402 | 0.092 | 18.923 | <.0001     | 0.669          | 0.558  | 0.802  |
|                               |               | 28-30             | -0.052 | 0.042 | 1.554  | 0.2124     | 0.949          | 0.874  | 1.03   |
|                               |               | 31-33             | -0.036 | 0.023 | 2.396  | 0.1216     | 0.964          | 0.921  | 1.01   |
|                               |               | 34-36             | 0.024  | 0.010 | 5.900  | 0.0151     | 1.025          | 1.005  | 1.045  |
|                               | Fixed-effects | 23-27             | -0.443 | 0.158 | 7.865  | 0.005      | 0.642          | 0.471  | 0.875  |
|                               |               | 28-30             | -0.356 | 0.080 | 19.876 | <.0001     | 0.7            | 0.598  | 0.819  |
|                               |               | 31-33             | -0.193 | 0.044 | 19.101 | <.0001     | 0.824          | 0.756  | 0.899  |
|                               |               | 34-36             | -0.102 | 0.019 | 28.426 | <.0001     | 0.903          | 0.87   | 0.937  |

Note. See note on Table E11.1

**Table E11.3. ML estimates for the baseline and fixed-effects models with ordinal gestational age (GA) predicting offspring *academic problems*.**

| Outcome                | Model         | GA Category (wks) | b      | SE    | ChiSq   | Pr > ChiSq | Point Estimate | 95% CL |       |
|------------------------|---------------|-------------------|--------|-------|---------|------------|----------------|--------|-------|
|                        |               |                   |        |       |         |            |                | Lower  | Upper |
| Failing Grades         | Baseline      | 23-27             | 0.735  | 0.073 | 100.735 | <.0001     | 2.086          | 1.807  | 2.408 |
|                        |               | 28-30             | 0.495  | 0.041 | 146.286 | <.0001     | 1.642          | 1.515  | 1.779 |
|                        |               | 31-33             | 0.264  | 0.024 | 115.562 | <.0001     | 1.302          | 1.241  | 1.367 |
|                        |               | 34-36             | 0.188  | 0.011 | 293.048 | <.0001     | 1.207          | 1.182  | 1.234 |
|                        | Fixed-effects | 23-27             | 0.818  | 0.169 | 23.425  | <.0001     | 2.267          | 1.627  | 3.157 |
|                        |               | 28-30             | 0.208  | 0.089 | 5.483   | 0.0192     | 1.232          | 1.035  | 1.467 |
|                        |               | 31-33             | -0.014 | 0.049 | 0.086   | 0.7683     | 0.985          | 0.894  | 1.087 |
|                        |               | 34-36             | -0.047 | 0.022 | 4.448   | 0.0349     | 0.954          | 0.913  | 0.997 |
| Education under 10 yrs | Baseline      | 23-27             | 0.533  | 0.068 | 59.950  | <.0001     | 1.705          | 1.489  | 1.951 |
|                        |               | 28-30             | 0.270  | 0.037 | 51.177  | <.0001     | 1.311          | 1.217  | 1.412 |
|                        |               | 31-33             | 0.120  | 0.021 | 30.137  | <.0001     | 1.128          | 1.08   | 1.177 |
|                        |               | 34-36             | 0.069  | 0.009 | 51.013  | <.0001     | 1.072          | 1.051  | 1.092 |
|                        | Fixed-effects | 23-27             | 0.362  | 0.139 | 6.755   | 0.0093     | 1.436          | 1.093  | 1.887 |
|                        |               | 28-30             | -0.037 | 0.076 | 0.237   | 0.6264     | 0.963          | 0.828  | 1.12  |
|                        |               | 31-33             | -0.133 | 0.044 | 9.099   | 0.0026     | 0.875          | 0.803  | 0.954 |
|                        |               | 34-36             | -0.155 | 0.019 | 63.766  | <.0001     | 0.856          | 0.824  | 0.889 |
| Higher Education       | Baseline      | 23-27             | -0.575 | 0.135 | 18.118  | <.0001     | 0.563          | 0.432  | 0.733 |
|                        |               | 28-30             | -0.382 | 0.060 | 40.589  | <.0001     | 0.682          | 0.606  | 0.767 |
|                        |               | 31-33             | -0.241 | 0.031 | 58.405  | <.0001     | 0.786          | 0.739  | 0.836 |
|                        |               | 34-36             | -0.155 | 0.013 | 137.348 | <.0001     | 0.856          | 0.834  | 0.878 |
|                        | Fixed-effects | 23-27             | -0.848 | 0.351 | 5.832   | 0.0157     | 0.428          | 0.215  | 0.852 |
|                        |               | 28-30             | 0.198  | 0.152 | 1.688   | 0.1938     | 1.219          | 0.904  | 1.645 |
|                        |               | 31-33             | 0.085  | 0.081 | 1.114   | 0.2911     | 1.089          | 0.929  | 1.277 |
|                        |               | 34-36             | -0.003 | 0.033 | 0.013   | 0.9068     | 0.996          | 0.933  | 1.063 |

Note. See note on Table E11.1

**E11.4. ML estimates for the baseline and fixed-effects models with ordinal gestational age (GA) predicting offspring *social adversity*. The GA reference bin included offspring born between 37 weeks and 42 weeks and 6 days.**

| Outcome                 | Model         | GA Category (wks) | b      | SE    | ChiSq   | Pr > ChiSq | Point Estimate | 95% CL |       |
|-------------------------|---------------|-------------------|--------|-------|---------|------------|----------------|--------|-------|
|                         |               |                   |        |       |         |            |                | Lower  | Upper |
| Parenthood              | Baseline      | 23-27             | -0.143 | 0.083 | 2.932   | 0.086      | 0.867          | 0.736  | 1.021 |
|                         |               | 28-30             | -0.059 | 0.036 | 2.609   | 0.106      | 0.942          | 0.876  | 1.013 |
|                         |               | 31-33             | -0.065 | 0.019 | 11.164  | 0.000      | 0.936          | 0.901  | 0.973 |
|                         |               | 34-36             | 0.025  | 0.008 | 9.619   | 0.001      | 1.026          | 1.009  | 1.042 |
|                         | Fixed-effects | 23-27             | -0.158 | 0.212 | 0.557   | 0.455      | 0.853          | 0.562  | 1.294 |
|                         |               | 28-30             | -0.239 | 0.101 | 5.501   | 0.019      | 0.787          | 0.645  | 0.961 |
|                         |               | 31-33             | -0.245 | 0.054 | 20.453  | <.0001     | 0.782          | 0.704  | 0.87  |
|                         |               | 34-36             | -0.142 | 0.022 | 39.368  | <.0001     | 0.867          | 0.83   | 0.907 |
| Ever Partnered          | Baseline      | 23-27             | -1.624 | 0.130 | 155.791 | <.0001     | 0.197          | 0.153  | 0.254 |
|                         |               | 28-30             | -0.544 | 0.054 | 98.891  | <.0001     | 0.58           | 0.521  | 0.646 |
|                         |               | 31-33             | -0.150 | 0.029 | 26.682  | <.0001     | 0.86           | 0.813  | 0.911 |
|                         |               | 34-36             | 0.104  | 0.011 | 76.601  | <.0001     | 1.11           | 1.084  | 1.136 |
|                         | Fixed-effects | 23-27             | -1.914 | 0.239 | 63.999  | <.0001     | 0.147          | 0.092  | 0.236 |
|                         |               | 28-30             | -0.777 | 0.113 | 46.545  | <.0001     | 0.459          | 0.367  | 0.574 |
|                         |               | 31-33             | -0.270 | 0.066 | 16.707  | <.0001     | 0.763          | 0.67   | 0.869 |
|                         |               | 34-36             | -0.003 | 0.028 | 0.013   | 0.9073     | 0.997          | 0.942  | 1.054 |
| Social Welfare Benefits | Baseline      | 23-27             | 0.242  | 0.062 | 14.965  | 0.0001     | 1.274          | 1.127  | 1.441 |
|                         |               | 28-30             | 0.300  | 0.032 | 86.155  | <.0001     | 1.35           | 1.267  | 1.439 |
|                         |               | 31-33             | 0.227  | 0.018 | 149.652 | <.0001     | 1.256          | 1.211  | 1.303 |
|                         |               | 34-36             | 0.154  | 0.008 | 337.723 | <.0001     | 1.167          | 1.148  | 1.186 |
|                         | Fixed-effects | 23-27             | 0.201  | 0.132 | 2.312   | 0.128      | 1.223          | 0.944  | 1.585 |
|                         |               | 28-30             | -0.000 | 0.068 | 0       | 0.994      | 1              | 0.874  | 1.143 |
|                         |               | 31-33             | -0.056 | 0.038 | 2.133   | 0.144      | 0.945          | 0.875  | 1.02  |
|                         |               | 34-36             | -0.003 | 0.017 | 0.032   | 0.857      | 0.997          | 0.964  | 1.031 |

Note. See note on Table E11.1



## E12. Online Appendix References

1. Epidemiology Cf. *The Swedish Medical Birth Register - A Summary of Content and Quality*. 2003.
2. Cnattingius S, Ericson A, Gunnarskog J, Kallen B. A quality study of a medical birth registry. *Scand. J. Soc. Med.* 1990;18(2):143-148.
3. Statistics Sweden. *Multi-generation register 2005 – A description of contents and quality*. Örebro: Statistics Sweden; 2006. 2006:6.
4. Centre for Epidemiology. The Swedish Hospital Discharge Register. <http://www.sos.se/epc/english/ParEng.htm#Publications>]. 2005.
5. WHO. *International Classification of Diseases, World Health Organization WHO*. Geneva 1992.
6. Fazel S, Grann M. The population impact of severe mental illness on violent crime. *American Journal of Psychiatry*. Aug 2006;163(8):1397-1403.
7. Swedish National Agency for Education. <http://www.skolverket.se/>.
8. Magnusson PKE, Gunnell D, Tynelius P, Smith GD, Rasmussen F. Strong inverse association between height and suicide in a large cohort of Swedish men: Evidence of early life origins of suicidal behavior? *American Journal of Psychiatry*. 2005;162:1373.
9. LISA database. [http://www.scb.se/Pages/List\\_\\_\\_\\_\\_257743.aspx](http://www.scb.se/Pages/List_____257743.aspx).
10. Wettermark B, Hammar N, Fored CM, et al. The new Swedish Prescribed Drug Register--opportunities for pharmacoepidemiological research and experience from the first six months. *Pharmacoepidemiol Drug Saf.* Jul 2007;16(7):726-735.
11. Burnham, Kenneth P. and David R. Anderson. 2002. *Model selection and multimodel inference: A practical information-theoretical approach*. 2d ed. New York: Springer.
12. Meyer KA, Williams P, Hernandez-Diaz S, Cnattingius S. Smoking and risk of oral clefts: Exploring the impact of study designs. *Epidemiology*. 2004;15:671-8.
13. D'Onofrio BM, Singh AL, Iliadou A, et al. Familial confounding of the association between maternal smoking during pregnancy and offspring criminality: A population-based study in Sweden. *Archives of General Psychiatry*. 2010;67:529-538.
14. Moster D, Lie RT, Markestad T. Long-term medical and social consequences of preterm birth. *N. Engl. J. Med.* 2008;359:262-273.
15. Lindstrom, K., Lindblad, F., Hjern, A. Preterm birth and Attention-Deficit/Hyperactivity Disorder in schoolchildren. *Pediatrics*. 2011;127:858-865.
16. Haglund, B. Birthweight distributions by gestational age: Comparison of LMP-based and ultrasound-based estimates of gestational age using data from the Swedish Birth Registry. *Paediatric and Perinatal Epidemiology*. 2007; 21:72-78.
